# Supplementary material for: Integrated proteomics and phosphoproteomics reveal perturbed regulative pathways in pancreatic ductal adenocarcinoma
Source: Royal Society of Chemistry journal article supplement (doi:10.1039/d0mo00125b), 2020-12-23
Supplement: d0mo00125b1.zip [file Supplementary material.docx]

Supplementary material for:

**Integrated proteomics and phosphoproteomics reveal perturbed regulative pathways in pancreatic ductal adenocarcinoma**

Lianyuan Tao1,2,#, Lijun Zhong 3,#, Yang Li4, Deyu Li2, Dianrong Xiu1,*and Juntuo Zhou5,*

1 Department of General Surgery, Peking University Third Hospital, No. 49, Hua Yuan North Rd, Hai Dian District, Beijing 100191, China

2 Department of Hepatobiliary Surgery, Henan Provincial People’s Hospital, People's Hospital of Zhengzhou University, School of Clinical Medicine, Henan University, Zhengzhou, Henan, 450003, China.

3 Medical and Health Analytical Center, Peking University Health Science Center, Beijing 100191, China

4 Department of Pathology, Peking University Health Science Center, Beijing 100191, China

5 Beijing Advanced Innovation Center for Big Data-Based Precision Medicine, Beihang University, Beijing 100083, China

**Figure S1**. Heat maps presenting expression profiles of poor and moderate differentiation.

**
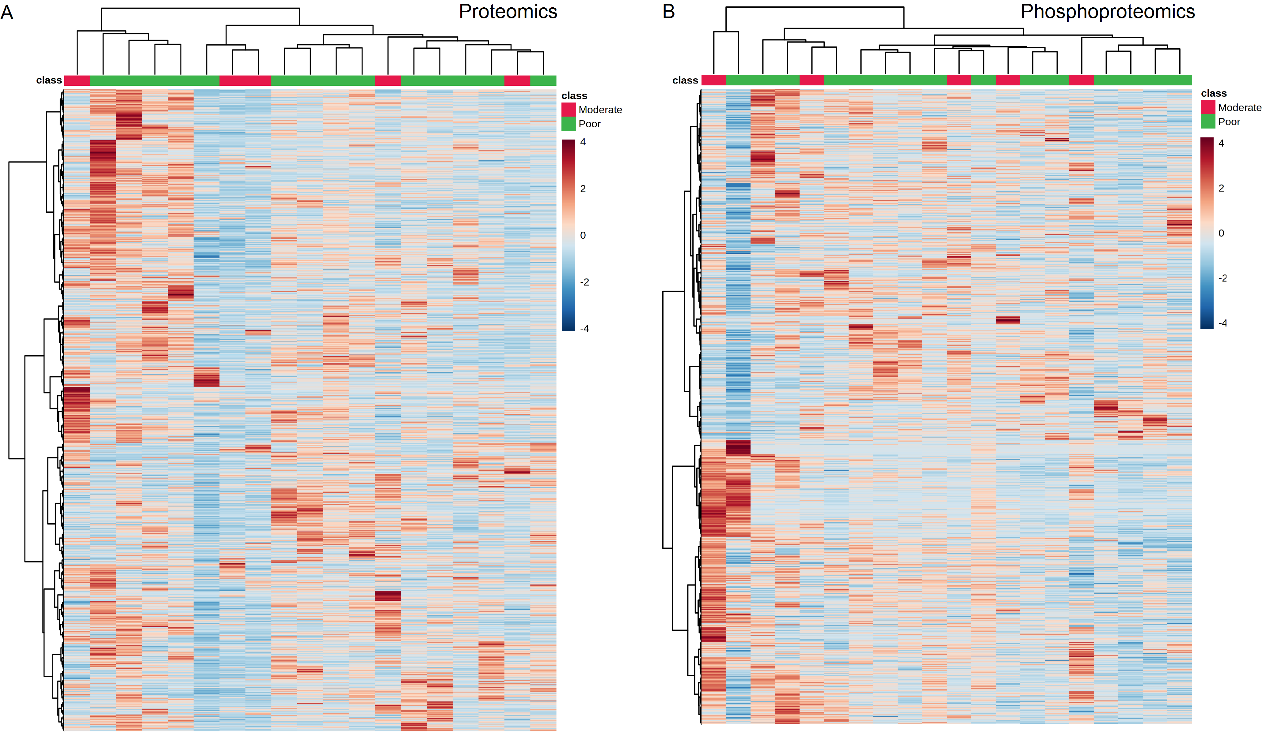
**
