# Supplementary material for: Integrated proteomics and phosphoproteomics reveal perturbed regulative pathways in pancreatic ductal adenocarcinoma
Source: Royal Society of Chemistry journal article supplement (doi:10.1039/d0mo00125b), 2020-12-23
Supplement: d0mo00125b1.zip [file Table S1. Baseline characteristics of the PDAC patients .xlsx]

## Sheet: Sheet1
Cohort	Sample ID	Gender	Age (years)	Differentiation	Platelets	Lymphocytes	Neutrophils	AFP (ng/mL)	CEA (ng/mL)	CA125 (U/mL)	CA199 (U/mL)	CA242 (U/mL)	Diameter (cm)	Lymph node metastasis	Nerve infiltration	Blood vessel invasion	TNM stage	AJCC7th stage	Surgical options
For protoemics and phosphoproteomics	1	Female	56	poor	240	1.28	1.47	1.89	1.27	59.52	542.8	34.93	2.5	Negative	Positive	Positive	T3N0M0	IIA	pancreaticoduodenectomy
For protoemics and phosphoproteomics	2	Male	53	poor	294	2.19	2.91	3.1	0.9	4.62	29.21	9.27	2	Positive	Positive	Positive	T3N1M0	IIB	pancreaticoduodenectomy
For protoemics and phosphoproteomics	3	Male	50	poor	271	1.4	2.53	6.47	1.31	27.31	83.82	7.55	3.5	Negative	Negative	Negative	T3N0M0	IIA	pancreaticoduodenectomy
For protoemics and phosphoproteomics	4	Female	53	poor	252	0.91	2.85	3.88	3.6	26.34	392.9	Missing	2.5	Positive	Positive	Negative	T3N1M0	IIB	pancreaticoduodenectomy
For protoemics and phosphoproteomics	5	Male	48	poor	184	0.77	4.49	4.22	38.34	31.06	449	11.03	4	Negative	Positive	Negative	T3N0M0	IIA	pancreaticoduodenectomy
For protoemics and phosphoproteomics	6	Female	44	poor	309	2.49	8.08	7.25	2.55	68.81	0.6	Missing	2	Positive	Positive	Positive	T1N1M0	IIB	pancreaticoduodenectomy
For protoemics and phosphoproteomics	7	Male	69	poor	179	1.71	4.85	4.87	9.31	Missing	4098	Missing	2.2	Negative	Positive	Positive	T3N0M0	IIA	pancreaticoduodenectomy
For protoemics and phosphoproteomics	8	Female	67	poor	141	0.55	7.18	4.3	4.97	28.81	1850	285.41	2.5	Negative	Positive	Negative	T3N0M0	IIA	pancreaticoduodenectomy
For protoemics and phosphoproteomics	9	Female	57	moderate	122	0.8	3.27	5.45	1.09	17.19	149.4	24.74	3	Positive	Positive	Positive	T3N1M0	IIB	pancreaticoduodenectomy
For protoemics and phosphoproteomics	10	Female	64	poor	203	1.42	3.46	4.34	1.96	15.1	22.38	6.4	5	Negative	Positive	Negative	T3N0M0	IIA	distal pancreatectomy
For protoemics and phosphoproteomics	11	Male	65	moderate	300	1.73	8.54	5.47	4.88	15.13	13.1	6.4	3.5	Negative	Negative	Negative	T3N0M0	IIA	pancreaticoduodenectomy
For protoemics and phosphoproteomics	12	Female	68	poor	251	1.04	3.6	2.81	1.72	11.17	726	25.82	2	Negative	Positive	Positive	T3N0M0	IIA	pancreaticoduodenectomy
For protoemics and phosphoproteomics	13	Male	64	poor	342	1.74	7.96	2.77	1.62	13.22	186.9	Missing	3	Negative	Negative	Negative	T3N0M0	IIA	pancreaticoduodenectomy
For protoemics and phosphoproteomics	14	Male	31	moderate	324	0.85	3.49	3.37	1.87	8.99	35.13	3.87	2.5	Negative	Negative	Negative	T2N0M0	IB	pancreaticoduodenectomy
For protoemics and phosphoproteomics	15	Female	62	moderate	190	1.54	2.75	4.16	1.73	10.01	719.4	49.33	2.5	Positive	Positive	Positive	T3N1M0	IIB	pancreaticoduodenectomy
For protoemics and phosphoproteomics	16	Male	72	poor	219	1.14	3.08	5.12	1.89	6.16	147	1.37	1.5	Positive	Positive	Negative	T3N1M0	IIB	pancreaticoduodenectomy
For protoemics and phosphoproteomics	17	Female	57	poor	261	2.2	4.51	3.29	0.91	16.51	41.99	Missing	4	Positive	Positive	Negative	T3N1M0	IIB	pancreaticoduodenectomy
For protoemics and phosphoproteomics	18	Male	63	poor	192	0.92	3.17	2.82	4.75	32.48	187.9	Missing	4	Positive	Positive	Positive	T3N1M0	IIB	pancreaticoduodenectomy
For protoemics and phosphoproteomics	19	Male	41	poor	235	1.31	3.67	3.68	4.33	49.51	930.7	25.14	2.5	Positive	Negative	Negative	T3N1M0	IIB	pancreaticoduodenectomy
For protoemics and phosphoproteomics	20	Female	76	moderate	234	2.03	2.4	1.39	20.79	20.73	1.6	miss	3	Negative	Positive	Negative	T2N0M0	IB	pancreaticoduodenectomy
For WB and IHC analysis	21	Female	52	poor	280	1.6	4.51	1.29	6.5	12.3	25.4	45.3	2.2	Positive	Positive	Negative	T3N0M0	IIA	pancreaticoduodenectomy
For WB and IHC analysis	22	Male	61	poor	254	0.95	2.6	5.4	9.8	15.1	40.32	18.5	3.1	Positive	Negative	Positive	T1N1M0	IIB	pancreaticoduodenectomy
For WB and IHC analysis	23	Female	70	poor	310	1.2	7.13	4.21	2.45	28.8	90.35	12.1	2.4	Negative	Positive	Negative	T3N0M0	IIA	pancreaticoduodenectomy
