# Supplementary material for: Integrated proteomics and phosphoproteomics reveal perturbed regulative pathways in pancreatic ductal adenocarcinoma
Source: Royal Society of Chemistry journal article supplement (doi:10.1039/d0mo00125b), 2020-12-23
Supplement: d0mo00125b1.zip [file Table S2. Dysregulated proteins in PDAC tumor tissue.xlsx]

## Sheet: Sheet1
Uniprot ID	Gene name	Protein name	Counts (up)	Counts (down)	p.adjusted
A0FGR8	ESYT2	Extended synaptotagmin-2	17	3	0.00024257
O00116	AGPS	Alkyldihydroxyacetonephosphate synthase, peroxisomal	20	0	1.9153e-07
O00182	LGALS9	Galectin-9	16	4	0.00076651
O00244	ATOX1	Copper transport protein ATOX1	18	2	7.7297e-05
O00299	CLIC1	Chloride intracellular channel protein 1	18	2	4.8468e-05
O00391	QSOX1	Sulfhydryl oxidase 1	20	0	8.5642e-07
O00425	IGF2BP3	Insulin-like growth factor 2 mRNA-binding protein 3	19	1	0.00019041
O00429	DNM1L	Dynamin-1-like protein	19	1	7.5207e-05
O00469	PLOD2	Procollagen-lysine,2-oxoglutarate 5-dioxygenase 2	18	2	5.0678e-07
O00505	KPNA3	Importin subunit alpha-4	18	2	0.00050564
O14498	ISLR	Immunoglobulin superfamily containing leucine-rich repeat protein	18	2	3.5042e-06
O14879	IFIT3	Interferon-induced protein with tetratricopeptide repeats 3	18	2	6.6828e-05
O14933	UBE2L6	Ubiquitin/ISG15-conjugating enzyme E2 L6	18	2	3.0449e-05
O14980	XPO1	Exportin-1	19	1	0.00030958
O15145	ARPC3	Actin-related protein 2/3 complex subunit 3	19	1	0.00027506
O15269	SPTLC1	Serine palmitoyltransferase 1	18	2	0.00021023
O15427	SLC16A3	Monocarboxylate transporter 4	18	2	5.1411e-05
O15460	P4HA2	Prolyl 4-hydroxylase subunit alpha-2	19	1	6.1942e-07
O15511	ARPC5	Actin-related protein 2/3 complex subunit 5	17	3	0.00054659
O43294	TGFB1I1	Transforming growth factor beta-1-induced transcript 1 protein	18	2	0.00042022
O43813	LANCL1	LanC-like protein 1	4	16	0.00094638
O43852	CALU	Calumenin	19	1	2.6191e-05
O60568	PLOD3	Multifunctional procollagen lysine hydroxylase and glycosyltransferase LH3	18	2	7.1933e-06
O60664	PLIN3	Perilipin-3	17	3	0.00038141
O60784	TOM1	Target of Myb protein 1	20	0	7.7297e-05
O75369	FLNB	Filamin-B	19	1	7.5207e-05
O75387	SLC43A1	Large neutral amino acids transporter small subunit 3	2	18	0.00041552
O75718	CRTAP	Cartilage-associated protein	18	2	8.9587e-06
O95302	FKBP9	Peptidyl-prolyl cis-trans isomerase FKBP9	18	2	3.7627e-06
O95373	IPO7	Importin-7	18	2	0.00032026
O95573	ACSL3	Long-chain-fatty-acid--CoA ligase 3	19	1	0.00071724
O95782	AP2A1	AP-2 complex subunit alpha-1	19	1	3.3399e-06
O95967	EFEMP2	EGF-containing fibulin-like extracellular matrix protein 2	19	1	5.0678e-07
O95994	AGR2	Anterior gradient protein 2 homolog	19	1	0.00036891
O96008	TOMM40	Mitochondrial import receptor subunit TOM40 homolog	18	2	0.00078242
P00325	ADH1B	Alcohol dehydrogenase 1B	3	17	1.7645e-05
P00338	LDHA	L-lactate dehydrogenase A chain	18	2	2.2516e-05
P00558	PGK1	Phosphoglycerate kinase 1	16	4	0.00053988
P00918	CA2	Carbonic anhydrase 2	1	19	0.00019741
P01033	TIMP1	Metalloproteinase inhibitor 1	17	3	2.9496e-05
P02452	COL1A1	Collagen alpha-1(I) chain	17	3	6.6828e-05
P02461	COL3A1	Collagen alpha-1(III) chain	17	3	0.00010218
P02545	LMNA	Prelamin-A/C	19	1	1.0062e-05
P02549	SPTA1	Spectrin alpha chain, erythrocytic 1	4	16	0.00083754
P02786	TFRC	Transferrin receptor protein 1	17	3	0.00040547
P03950	ANG	Angiogenin	18	2	0.00022576
P04080	CSTB	Cystatin-B	17	3	3.8062e-05
P04118	CLPS	Colipase	1	19	0.00042752
P04406	GAPDH	Glyceraldehyde-3-phosphate dehydrogenase	18	2	4.2204e-05
P05161	ISG15	Ubiquitin-like protein ISG15	18	2	6.8153e-06
P06703	S100A6	Protein S100-A6	17	3	0.00019041
P06731	CEACAM5	Carcinoembryonic antigen-related cell adhesion molecule 5	18	2	0.00016662
P06733	ENO1	Alpha-enolase	16	4	0.0006485
P06756	ITGAV	Integrin alpha-V	17	3	1.9211e-05
P06865	HEXA	Beta-hexosaminidase subunit alpha	20	0	2.9823e-05
P07099	EPHX1	Epoxide hydrolase 1	3	17	8.1312e-05
P07195	LDHB	L-lactate dehydrogenase B chain	4	16	4.404e-05
P07339	CTSD	Cathepsin D	20	0	0.00033899
P07355	ANXA2P2	Putative annexin A2-like protein	17	3	5.7315e-05
P07686	HEXB	Beta-hexosaminidase subunit beta	20	0	8.9887e-06
P07711	CTSL	Cathepsin L1	20	0	2.6191e-05
P07858	CTSB	Cathepsin B	17	3	4.1471e-05
P07900	HSP90AA1	Heat shock protein HSP 90-alpha	17	3	8.4956e-05
P07942	LAMB1	Laminin subunit beta-1	18	2	7.9122e-05
P07996	THBS1	Thrombospondin-1	19	1	3.697e-05
P08123	COL1A2	Collagen alpha-2(I) chain	16	4	0.00011717
P08238	HSP90AB1	Heat shock protein HSP 90-beta	17	3	0.00024543
P08253	MMP2	72 kDa type IV collagenase	18	2	0.00010066
P08648	ITGA5	Integrin alpha-5	17	3	0.00074037
P08727	KRT19	Keratin, type I cytoskeletal 19	20	0	8.1715e-05
P08758	ANXA5	Annexin A5	17	3	0.00019741
P09110	ACAA1	3-ketoacyl-CoA thiolase, peroxisomal	19	1	8.9823e-05
P09211	GSTP1	Glutathione S-transferase P	18	2	0.00058136
P09382	LGALS1	Galectin-1	17	3	8.8923e-05
P09417	QDPR	Dihydropteridine reductase	3	17	0.00027857
P09486	SPARC	SPARC	17	3	5.594e-05
P09619	PDGFRB	Platelet-derived growth factor receptor beta	18	2	0.00011114
P10599	TXN	Thioredoxin	16	4	0.00091916
P11310	ACADM	Medium-chain specific acyl-CoA dehydrogenase, mitochondrial	4	16	0.00085095
P13284	IFI30	Gamma-interferon-inducible lysosomal thiol reductase	19	1	3.7654e-05
P13611	VCAN	Versican core protein	18	2	1.1501e-05
P13674	P4HA1	Prolyl 4-hydroxylase subunit alpha-1	19	1	2.8045e-06
P13716	ALAD	Delta-aminolevulinic acid dehydratase	2	18	3.3271e-05
P13797	PLS3	Plastin-3	18	2	6.1942e-07
P14091	CTSE	Cathepsin E	18	2	0.00046663
P14618	PKM	Pyruvate kinase PKM	18	2	2.6191e-05
P15090	FABP4	Fatty acid-binding protein, adipocyte	3	17	0.0005923
P15311	EZR	Ezrin	18	2	0.00023188
P16219	ACADS	Short-chain specific acyl-CoA dehydrogenase, mitochondrial	3	17	0.00080544
P16435	POR	NADPH--cytochrome P450 reductase	19	1	0.00026277
P16671	CD36	Platelet glycoprotein 4	2	18	4.3899e-06
P17301	ITGA2	Integrin alpha-2	19	1	1.2952e-05
P17655	CAPN2	Calpain-2 catalytic subunit	18	2	0.0002072
P17931	LGALS3	Galectin-3	18	2	1.1944e-05
P17936	IGFBP3	Insulin-like growth factor-binding protein 3	16	4	2.4816e-05
P18031	PTPN1	Tyrosine-protein phosphatase non-receptor type 1	17	3	0.00076849
P18084	ITGB5	Integrin beta-5	17	3	6.7613e-05
P18283	GPX2	Glutathione peroxidase 2	17	3	0.00085785
P19367	HK1	Hexokinase-1	16	4	0.00033881
P19525	EIF2AK2	Interferon-induced, double-stranded RNA-activated protein kinase	18	2	5.5945e-05
P19971	TYMP	Thymidine phosphorylase	18	2	7.1933e-06
P20591	MX1	Interferon-induced GTP-binding protein Mx1	20	0	4.7439e-07
P20908	COL5A1	Collagen alpha-1(V) chain	18	2	2.4961e-06
P21333	FLNA	Filamin-A	16	4	0.00068387
P21695	GPD1	Glycerol-3-phosphate dehydrogenase [NAD(+)], cytoplasmic	2	18	0.00021591
P21741	MDK	Midkine	18	2	6.0564e-06
P21796	VDAC1	Voltage-dependent anion-selective channel protein 1	16	4	0.00086693
P21810	BGN	Biglycan	17	3	0.00074486
P22307	SCP2	Non-specific lipid-transfer protein	17	3	0.00077203
P22352	GPX3	Glutathione peroxidase 3	16	4	0.00014587
P23142	FBLN1	Fibulin-1	16	4	2.518e-05
P23528	CFL1	Cofilin-1	18	2	0.0005501
P24557	TBXAS1	Thromboxane-A synthase	19	1	0.00011717
P24752	ACAT1	Acetyl-CoA acetyltransferase, mitochondrial	3	17	0.00019741
P25098	GRK2	Beta-adrenergic receptor kinase 1	19	1	6.6828e-05
P25685	DNAJB1	DnaJ homolog subfamily B member 1	17	3	0.00010412
P25815	S100P	Protein S100-P	18	2	0.0006141
P28288	ABCD3	ATP-binding cassette sub-family D member 3	18	2	0.00013594
P28330	ACADL	Long-chain specific acyl-CoA dehydrogenase, mitochondrial	2	18	0.00021023
P29728	OAS2	2-5-oligoadenylate synthase 2	20	0	7.0868e-06
P30041	PRDX6	Peroxiredoxin-6	3	17	0.00027968
P30046	DDTL	D-dopachrome decarboxylase-like protein	3	17	0.00033897
P30086	PEBP1	Phosphatidylethanolamine-binding protein 1	4	16	0.00036891
P30153	PPP2R1A	Serine/threonine-protein phosphatase 2A 65 kDa regulatory subunit A alpha isoform	17	3	0.00088085
P30533	LRPAP1	Alpha-2-macroglobulin receptor-associated protein	16	4	0.00033249
P31949	S100A11	Protein S100-A11	18	2	2.2596e-06
P32119	PRDX2	Peroxiredoxin-2	1	19	3.6668e-06
P32320	CDA	Cytidine deaminase	17	3	0.00077508
P35442	THBS2	Thrombospondin-2	19	1	8.6806e-09
P36543	ATP6V1E1	V-type proton ATPase subunit E 1	18	2	0.00011114
P36952	SERPINB5	Serpin B5	20	0	3.8409e-06
P36955	SERPINF1	Pigment epithelium-derived factor	17	3	6.4862e-05
P37802	TAGLN2	Transgelin-2	19	1	3.6355e-06
P38117	ETFB	Electron transfer flavoprotein subunit beta	4	16	0.00046324
P40121	CAPG	Macrophage-capping protein	19	1	5.845e-07
P40261	NNMT	Nicotinamide N-methyltransferase	19	1	1.1944e-05
P40855	PEX19	Peroxisomal biogenesis factor 19	16	4	0.00099896
P41236	PPP1R2B	Protein phosphatase inhibitor 2 family member B	19	1	6.6828e-05
P42224	STAT1	Signal transducer and activator of transcription 1-alpha/beta	18	2	0.00023188
P42285	MTREX	Exosome RNA helicase MTR4	18	2	0.00079953
P43490	NAMPT	Nicotinamide phosphoribosyltransferase	18	2	3.2579e-05
P46940	IQGAP1	Ras GTPase-activating-like protein IQGAP1	19	1	1.0413e-05
P48506	GCLC	Glutamate--cysteine ligase catalytic subunit	4	16	0.00018001
P48960	CD97	CD97 antigen	18	2	0.0007732
P49189	ALDH9A1	4-trimethylaminobutyraldehyde dehydrogenase	3	17	1.1944e-05
P49747	COMP	Cartilage oligomeric matrix protein	19	1	2.3222e-08
P49748	ACADVL	Very long-chain specific acyl-CoA dehydrogenase, mitochondrial	4	16	0.00033088
P49902	NT5C2	Cytosolic purine 5-nucleotidase	19	1	3.9525e-06
P50281	MMP14	Matrix metalloproteinase-14	19	1	6.1942e-07
P50454	SERPINH1	Serpin H1	17	3	2.9823e-05
P50479	PDLIM4	PDZ and LIM domain protein 4	18	2	6.1942e-07
P50995	ANXA11	Annexin A11	17	3	0.00041552
P51148	RAB5C	Ras-related protein Rab-5C	17	3	0.00073713
P51888	PRELP	Prolargin	17	3	0.0002607
P52630	STAT2	Signal transducer and activator of transcription 2	18	2	5.8289e-06
P53634	CTSC	Dipeptidyl peptidase 1	20	0	9.2973e-05
P54315	PNLIPRP1	Inactive pancreatic lipase-related protein 1	1	19	0.00062212
P55011	SLC12A2	Solute carrier family 12 member 2	17	3	4.3983e-05
P57737	CORO7	Coronin-7	17	3	0.00098627
P58107	EPPK1	Epiplakin	19	1	6.6828e-05
P59998	ARPC4	Actin-related protein 2/3 complex subunit 4	17	3	0.00019299
P60891	PRPS1	Ribose-phosphate pyrophosphokinase 1	2	18	6.6828e-05
P60903	S100A10	Protein S100-A10	18	2	0.00011717
P61160	ACTR2	Actin-related protein 2	18	2	0.00021416
P61289	PSME3	Proteasome activator complex subunit 3	19	1	4.2204e-05
P61981	YWHAG	14-3-3 protein gamma	18	2	0.00011491
P63010	AP2B1	AP-2 complex subunit beta	18	2	4.8032e-05
P63104	YWHAZ	14-3-3 protein zeta/delta	18	2	5.8665e-05
P67936	TPM4	Tropomyosin alpha-4 chain	19	1	4.9951e-06
P68871	HBB	Hemoglobin subunit beta	4	16	0.00064052
P83111	LACTB	Serine beta-lactamase-like protein LACTB, mitochondrial	18	2	0.00035999
P84085	ARF5	ADP-ribosylation factor 5	17	3	0.0006485
P98095	FBLN2	Fibulin-2	17	3	0.00012369
P98160	HSPG2	Basement membrane-specific heparan sulfate proteoglycan core protein	18	2	0.00073636
Q01518	CAP1	Adenylyl cyclase-associated protein 1	18	2	0.00028072
Q02809	PLOD1	Procollagen-lysine,2-oxoglutarate 5-dioxygenase 1	18	2	0.00025918
Q02818	NUCB1	Nucleobindin-1	19	1	5.6396e-05
Q03518	TAP1	Antigen peptide transporter 1	16	4	0.00033249
Q04206	RELA	Transcription factor p65	17	3	0.00033249
Q04695	KRT17	Keratin, type I cytoskeletal 17	20	0	4.3899e-06
Q04917	YWHAH	14-3-3 protein eta	19	1	3.6624e-05
Q06828	FMOD	Fibromodulin	16	4	0.00077449
Q07866	KLC1	Kinesin light chain 1	18	2	0.00086693
Q07954	LRP1	Prolow-density lipoprotein receptor-related protein 1	17	3	0.00053133
Q07960	ARHGAP1	Rho GTPase-activating protein 1	18	2	0.00017326
Q08209	PPP3CA	Serine/threonine-protein phosphatase 2B catalytic subunit alpha isoform	17	3	0.00027731
Q08380	LGALS3BP	Galectin-3-binding protein	18	2	2.7435e-05
Q08431	MFGE8	Lactadherin	17	3	0.00097076
Q08752	PPID	Peptidyl-prolyl cis-trans isomerase D	19	1	0.00076849
Q12792	TWF1	Twinfilin-1	18	2	0.00012369
Q12797	ASPH	Aspartyl/asparaginyl beta-hydroxylase	17	3	0.00050652
Q12805	EFEMP1	EGF-containing fibulin-like extracellular matrix protein 1	16	4	0.00014171
Q12882	DPYD	Dihydropyrimidine dehydrogenase [NADP(+)]	18	2	0.00016786
Q12884	FAP	Prolyl endopeptidase FAP	20	0	8.6806e-09
Q12929	EPS8	Epidermal growth factor receptor kinase substrate 8	17	3	0.00060886
Q12965	MYO1E	Unconventional myosin-Ie	19	1	0.00012104
Q13228	SELENBP1	Methanethiol oxidase	1	19	0.00019741
Q13308	PTK7	Inactive tyrosine-protein kinase 7	18	2	1.5717e-07
Q13492	PICALM	Phosphatidylinositol-binding clathrin assembly protein	19	1	0.00011194
Q13509	TUBB3	Tubulin beta-3 chain	20	0	3.3399e-06
Q13636	RAB31	Ras-related protein Rab-31	19	1	1.0893e-05
Q13643	FHL3	Four and a half LIM domains protein 3	18	2	4.3165e-05
Q13751	LAMB3	Laminin subunit beta-3	18	2	9.9458e-06
Q13753	LAMC2	Laminin subunit gamma-2	17	3	0.00043807
Q14112	NID2	Nidogen-2	17	3	5.8154e-05
Q14160	SCRIB	Protein scribble homolog	17	3	0.00090984
Q14192	FHL2	Four and a half LIM domains protein 2	19	1	1.9809e-05
Q14195	DPYSL3	Dihydropyrimidinase-related protein 3	16	4	0.00034327
Q14247	CTTN	Src substrate cortactin	18	2	0.0005501
Q14573	ITPR3	Inositol 1,4,5-trisphosphate receptor type 3	19	1	4.118e-06
Q14651	PLS1	Plastin-1	19	1	4.8468e-05
Q14764	MVP	Major vault protein	18	2	0.00042766
Q14766	LTBP1	Latent-transforming growth factor beta-binding protein 1	17	3	1.364e-05
Q14767	LTBP2	Latent-transforming growth factor beta-binding protein 2	18	2	1.0413e-05
Q14956	GPNMB	Transmembrane glycoprotein NMB	18	2	5.535e-05
Q15063	POSTN	Periostin	19	1	1.4524e-07
Q15113	PCOLCE	Procollagen C-endopeptidase enhancer 1	17	3	7.0545e-05
Q15149	PLEC	Plectin	19	1	5.0678e-07
Q15165	PON2	Serum paraoxonase/arylesterase 2	19	1	5.8291e-05
Q15417	CNN3	Calponin-3	19	1	2.9743e-06
Q15436	SEC23A	Protein transport protein Sec23A	19	1	1.1501e-05
Q15582	TGFBI	Transforming growth factor-beta-induced protein ig-h3	18	2	7.1351e-05
Q15907	RAB11B	Ras-related protein Rab-11B	19	1	6.6654e-05
Q16270	IGFBP7	Insulin-like growth factor-binding protein 7	19	1	0.00014236
Q16363	LAMA4	Laminin subunit alpha-4	17	3	0.00033835
Q16539	MAPK14	Mitogen-activated protein kinase 14	17	3	0.00035304
Q16543	CDC37	Hsp90 co-chaperone Cdc37	18	2	0.00074486
Q16775	HAGH	Hydroxyacylglutathione hydrolase, mitochondrial	3	17	1.2596e-05
Q16787	LAMA3	Laminin subunit alpha-3	16	4	0.00039424
Q16836	HADH	Hydroxyacyl-coenzyme A dehydrogenase, mitochondrial	4	16	0.00023284
Q27J81	INF2	Inverted formin-2	18	2	0.00014033
Q32MZ4	LRRFIP1	Leucine-rich repeat flightless-interacting protein 1	16	4	0.00051658
Q32P28	P3H1	Prolyl 3-hydroxylase 1	18	2	3.9525e-06
Q4G0N4	NADK2	NAD kinase 2, mitochondrial	4	16	0.00071724
Q53GG5	PDLIM3	PDZ and LIM domain protein 3	18	2	0.0003911
Q53SF7	COBLL1	Cordon-bleu protein-like 1	3	17	2.9727e-05
Q56VL3	OCIAD2	OCIA domain-containing protein 2	18	2	0.00015102
Q66K74	MAP1S	Microtubule-associated protein 1S	18	2	0.00089324
Q6FHJ7	SFRP4	Secreted frizzled-related protein 4	19	1	8.5076e-07
Q6NUK1	SLC25A24	Calcium-binding mitochondrial carrier protein SCaMC-1	17	3	0.00011702
Q6P4A8	PLBD1	Phospholipase B-like 1	18	2	6.8484e-05
Q6PCB0	VWA1	von Willebrand factor A domain-containing protein 1	18	2	0.00071724
Q6PIU2	NCEH1	Neutral cholesterol ester hydrolase 1	16	4	0.0002607
Q6UX71	PLXDC2	Plexin domain-containing protein 2	18	2	2.8759e-06
Q6WCQ1	MPRIP	Myosin phosphatase Rho-interacting protein	18	2	0.00020193
Q6WKZ4	RAB11FIP1	Rab11 family-interacting protein 1	17	3	0.00088085
Q6YHK3	CD109	CD109 antigen	18	2	8.8923e-05
Q6ZXV5	TMTC3	Transmembrane and TPR repeat-containing protein 3	16	4	0.00016208
Q70UQ0	IKBIP	Inhibitor of nuclear factor kappa-B kinase-interacting protein	18	2	1.7645e-05
Q7L5N1	COPS6	COP9 signalosome complex subunit 6	4	16	0.00021023
Q7L5N7	LPCAT2	Lysophosphatidylcholine acyltransferase 2	19	1	0.00010791
Q7Z4H8	KDELC2	KDEL motif-containing protein 2	17	3	0.00027437
Q8IUX7	AEBP1	Adipocyte enhancer-binding protein 1	19	1	2.305e-07
Q8IVF2	AHNAK2	Protein AHNAK2	19	1	0.00045997
Q8IWB7	WDFY1	WD repeat and FYVE domain-containing protein 1	19	1	0.00013078
Q8IWU6	SULF1	Extracellular sulfatase Sulf-1	19	1	2.9743e-06
Q8N4P3	HDDC3	Guanosine-3,5-bis(diphosphate) 3-pyrophosphohydrolase MESH1	2	18	0.00070152
Q8NC56	LEMD2	LEM domain-containing protein 2	20	0	8.4956e-05
Q8NE86	MCU	Calcium uniporter protein, mitochondrial	20	0	9.1874e-07
Q8NI60	COQ8A	Atypical kinase COQ8A, mitochondrial	2	18	0.00023537
Q8TED1	GPX8	Probable glutathione peroxidase 8	18	2	6.6828e-05
Q8WUP2	FBLIM1	Filamin-binding LIM protein 1	18	2	7.0943e-05
Q8WWI1	LMO7	LIM domain only protein 7	18	2	6.1942e-07
Q8WWI5	SLC44A1	Choline transporter-like protein 1	16	4	0.00024208
Q8WX93	PALLD	Palladin	19	1	0.00011717
Q92530	PSMF1	Proteasome inhibitor PI31 subunit	4	16	8.4956e-05
Q92598	HSPH1	Heat shock protein 105 kDa	19	1	1.0893e-05
Q96AY3	FKBP10	Peptidyl-prolyl cis-trans isomerase FKBP10	19	1	3.6355e-06
Q96BJ3	AIDA	Axin interactor, dorsalization-associated protein	17	3	0.00033249
Q96CG8	CTHRC1	Collagen triple helix repeat-containing protein 1	20	0	1.9241e-08
Q96D15	RCN3	Reticulocalbin-3	18	2	6.5349e-06
Q96DC8	ECHDC3	Enoyl-CoA hydratase domain-containing protein 3, mitochondrial	4	16	0.00041552
Q96DH6	MSI2	RNA-binding protein Musashi homolog 2	17	3	0.0003495
Q96FQ6	S100A16	Protein S100-A16	18	2	6.4596e-05
Q96HC4	PDLIM5	PDZ and LIM domain protein 5	19	1	4.0097e-05
Q96HE7	ERO1A	ERO1-like protein alpha	16	4	0.00074037
Q96HF1	SFRP2	Secreted frizzled-related protein 2	18	2	1.3492e-07
Q96QK1	VPS35	Vacuolar protein sorting-associated protein 35	18	2	0.00089321
Q96RQ9	IL4I1	L-amino-acid oxidase	19	1	1.2903e-05
Q99439	CNN2	Calponin-2	19	1	2.9496e-05
Q99497	PARK7	Protein/nucleic acid deglycase DJ-1	4	16	0.00090984
Q99536	VAT1	Synaptic vesicle membrane protein VAT-1 homolog	19	1	0.00024543
Q99715	COL12A1	Collagen alpha-1(XII) chain	18	2	2.0014e-07
Q99729	HNRNPAB	Heterogeneous nuclear ribonucleoprotein A/B	18	2	0.00069627
Q99983	OMD	Osteomodulin	18	2	0.00011505
Q9BR76	CORO1B	Coronin-1B	17	3	0.00023188
Q9BS40	LXN	Latexin	17	3	0.00012965
Q9BT78	COPS4	COP9 signalosome complex subunit 4	2	18	0.00022576
Q9BWM7	SFXN3	Sideroflexin-3	19	1	8.2559e-06
Q9BX97	PLVAP	Plasmalemma vesicle-associated protein	4	16	0.00036995
Q9BXN1	ASPN	Asporin	18	2	7.7297e-05
Q9C002	NMES1	Normal mucosa of esophagus-specific gene 1 protein	18	2	0.00033249
Q9H0R4	HDHD2	Haloacid dehalogenase-like hydrolase domain-containing protein 2	3	17	2.5402e-05
Q9H6X2	ANTXR1	Anthrax toxin receptor 1	18	2	5.4952e-05
Q9HAW8	UGT1A7	UDP-glucuronosyltransferase 1-7	19	1	0.0002033
Q9HB40	SCPEP1	Retinoid-inducible serine carboxypeptidase	17	3	0.0005373
Q9HB90	RRAGD	Ras-related GTP-binding protein D	18	2	0.00038141
Q9HC07	TMEM165	Transmembrane protein 165	17	3	0.0006485
Q9HCY8	S100A14	Protein S100-A14	18	2	1.976e-05
Q9NPQ8	RIC8A	Synembryn-A	19	1	0.00012369
Q9NQ88	TIGAR	Fructose-2,6-bisphosphatase TIGAR	18	2	6.3289e-05
Q9NQT8	KIF13B	Kinesin-like protein KIF13B	18	2	0.00017708
Q9NR99	MXRA5	Matrix-remodeling-associated protein 5	19	1	1.6843e-08
Q9NUQ6	SPATS2L	SPATS2-like protein	18	2	2.4961e-06
Q9NVA2	SEPTIN11	Septin-11	18	2	2.4816e-05
Q9NZM1	MYOF	Myoferlin	19	1	1.6956e-05
Q9NZU5	LMCD1	LIM and cysteine-rich domains protein 1	17	3	4.1471e-05
Q9P0K7	RAI14	Ankycorbin	18	2	0.0005536
Q9P1F3	ABRACL	Costars family protein ABRACL	17	3	0.00056308
Q9UBE0	SAE1	SUMO-activating enzyme subunit 1	18	2	0.00033835
Q9UBG0	MRC2	C-type mannose receptor 2	17	3	6.2751e-05
Q9UK41	VPS28	Vacuolar protein sorting-associated protein 28 homolog	20	0	6.6654e-05
Q9UKK3	PARP4	Poly [ADP-ribose] polymerase 4	18	2	6.2033e-05
Q9UL12	SARDH	Sarcosine dehydrogenase, mitochondrial	3	17	0.0004525
Q9ULC5	ACSL5	Long-chain-fatty-acid--CoA ligase 5	16	4	0.00040694
Q9ULZ3	PYCARD	Apoptosis-associated speck-like protein containing a CARD	17	3	0.0003495
Q9Y240	CLEC11A	C-type lectin domain family 11 member A	20	0	4.3899e-06
Q9Y305	ACOT9	Acyl-coenzyme A thioesterase 9, mitochondrial	20	0	0.00026216
Q9Y5S2	CDC42BPB	Serine/threonine-protein kinase MRCK beta	17	3	0.00023669
Q9Y680	FKBP7	Peptidyl-prolyl cis-trans isomerase FKBP7	18	2	2.4961e-06
Q9Y696	CLIC4	Chloride intracellular channel protein 4	17	3	0.00021631
Q9Y6K5	OAS3	2-5-oligoadenylate synthase 3	18	2	4.1777e-06
