# Supplementary material for: Integrated proteomics and phosphoproteomics reveal perturbed regulative pathways in pancreatic ductal adenocarcinoma
Source: Royal Society of Chemistry journal article supplement (doi:10.1039/d0mo00125b), 2020-12-23
Supplement: d0mo00125b1.zip [file Table S3. Dysregulated phosphoproteins in PDAC tumor tissue.xlsx]

## Sheet: peptides
Sequence	Uniprot ID	Gene names	Protein names	Phospho (STY) site IDs	Counts (up)	Counts (down)	p.adjusted
AAEEQGDDQDSEKSKPAGSDGER	Q1KMD3	HNRNPUL2	Heterogeneous nuclear ribonucleoprotein U-like protein 2	5602;5603;5604	16	3	0.00090859
AALMTPGTGAPPAPGDFSGEGSQGLPDPSPEPK	P19971	TYMP	Thymidine phosphorylase	2352;2353;12745;12746	17	4	0.00016418
AAPPPPPPPPPLESSPR	Q5T4S7	UBR4	E3 ubiquitin-protein ligase UBR4	6055;6056	19	2	5.5918e-05
AASLNYLNQPSAAPLQVSR	Q9NSK0	KLC4	Kinesin light chain 4	10493	16	3	0.00090206
AASPPASASDLIEQQQK	Q5VSL9	STRIP1	Striatin-interacting protein 1	6172	15	4	0.00071524
AASQGSDSPLLPAQR	Q5TCZ1	SH3PXD2A	SH3 and PX domain-containing protein 2A	6130;6131	18	2	0.00037446
AASSSSPGSPVASSPSR	Q92538	GBF1	Golgi-specific brefeldin A-resistance guanine nucleotide exchange factor 1	8411;8412;8413;8414;8415;8416;8417	17	2	0.00032986
AAVLSDSEDEEKASAK	Q96ST2	IWS1	Protein IWS1 homolog	9203;9204	15	4	0.00013234
AEDGATPSPSNETPKK	P29966	MARCKS	Myristoylated alanine-rich C-kinase substrate	2682;2683;12818;12819	17	2	0.00035174
AEDGSVIDYELIDQDAR	P07355	ANXA2	Annexin A2	1759;14685	19	0	8.9773e-06
AEGAATEEEGTPKESEPQAAAEPAEAK	P80723	BASP1	Brain acid soluble protein 1	3833;13073;13074	16	3	0.00041578
AELEEMEEVHPSDEEEEDATK	P78559	MAP1A	Microtubule-associated protein 1A;MAP1A heavy chain;MAP1 light chain LC2	3793	19	0	2.625e-05
AESMLQQADK	P13797	PLS3	Plastin-3	2062	19	0	3.1844e-05
AGDLLEDSPK	P51858	HDGF	Hepatoma-derived growth factor	3430	15	4	0.00024993
AHTPTPGIYMGR	Q13595	TRA2A	Transformer-2 protein homolog alpha	13278;13279	15	4	7.9589e-05
AITSLLGGGSPK	Q6KC79	NIPBL	Nipped-B-like protein	6498	17	2	0.00047099
ALASIDSK	P18206	VCL	Vinculin	2273;2274	19	0	0.00025755
ALGVISNFQSSPK	O94876	TMCC1	Transmembrane and coiled-coil domains protein 1	1238;1239	16	3	0.00092918
ALMGSPQLVAAVVR	P14923	JUP	Junction plakoglobin	2099	19	0	0.00021069
ANSFVGTAQYVSPELLTEK	Q6A1A2	PDPK2P	Putative 3-phosphoinositide-dependent protein kinase 2;3-phosphoinositide-dependent protein kinase 1	578	17	2	0.00030898
ANSTSDSVFTETPSPVLK	Q9UKI2	CDC42EP3	Cdc42 effector protein 3	11155;11156;11157;11158;14424	18	1	2.237e-05
APLKPYPVSPSDK	P41252	IARS	Isoleucine--tRNA ligase, cytoplasmic	2904	17	3	0.00030898
APQQQPPPQQPPPPQPPPQQPPPPPSYSPAR	Q9BUJ2	HNRNPUL1	Heterogeneous nuclear ribonucleoprotein U-like protein 1	9516;9517	18	2	0.00070543
APSDSSLGTPSDGRPELR	Q15642	TRIP10	Cdc42-interacting protein 4	5419;5420;5421;5422;13386	17	2	0.00010073
APSEEELHGDQTDFGQGSQSPQKQEEQR	Q8TE77	SSH3	Protein phosphatase Slingshot homolog 3	8106;8107;8108	18	1	0.00023407
APSPPPPGSEAAPSPSK	Q96GP6	SCARF2	Scavenger receptor class F member 2	8879	17	2	0.00010457
AQISSPNLR	Q5TCZ1	SH3PXD2A	SH3 and PX domain-containing protein 2A	6132;6133	19	0	4.1281e-07
AQLEPVASPAK	Q15149	PLEC	Plectin	5311	16	3	0.00075649
AQRLSQETEALGR	Q02818	NUCB1	Nucleobindin-1	4016	16	3	0.00040052
AQSSPAAPASLSAPEPASQAR	Q8WUI4	HDAC7	Histone deacetylase 7	8209;8210	16	4	0.0002825
AQSSPASATFPVSVQEPPTKPR	P56524	HDAC4	Histone deacetylase 4	3593;3594;3595;13018	16	3	0.00062697
AQTLPTSVVTITSESSPGKR	Q01082	SPTBN1	Spectrin beta chain, non-erythrocytic 1	3925;3926;3927;13093;13094	17	2	0.00068095
ASHLRPPSPLLVR	Q8TDB6	DTX3L	E3 ubiquitin-protein ligase DTX3L	8056;8057	16	3	0.00017889
ASLGSLEGEAEAEASSPK	Q09666	AHNAK	Neuroblast differentiation-associated protein AHNAK	4304;4305;4306;4307	17	2	0.00069689
ASPAPGSGHPEGPGAHLDMNSLDR	O94826	TOMM70A	Mitochondrial import receptor subunit TOM70	1205;1206	19	0	0.00024485
ASPEPPGPESSSR	Q9C0C2	TNKS1BP1	182 kDa tankyrase-1-binding protein	9747	17	2	3.7531e-05
ASSLGEIDESSELR	Q16513	PKN2	Serine/threonine-protein kinase N2	5542;5543	15	4	0.00072803
ATISDEEIER	Q9UQN3	CHMP2B	Charged multivesicular body protein 2b	11657;14532	16	3	0.00047426
AVAGVMITASHNR	Q6PCE3	PGM2L1	Glucose 1,6-bisphosphate synthase	6598	18	1	0.0002302
AVPMAPAPASPGSSNDSSAR	Q66K74	MAP1S	Microtubule-associated protein 1S;MAP1S heavy chain;MAP1S light chain	6354	18	1	0.0002825
AVSPPHLDGPPSPR	P29590	PML	Protein PML	2657;2658	18	1	8.3452e-06
DAHDVSPTSTDTEAQLTVER	Q8IVF2	AHNAK2	Protein AHNAK2	7414;7415;13740;13741	18	1	0.00013363
DASDGEDEKPPLPPR	O15357	INPPL1	Phosphatidylinositol 3,4,5-trisphosphate 5-phosphatase 2	559	18	1	0.00030981
DATPPVSPINMEDQER	P17275	JUNB	Transcription factor jun-B	2232;12723	18	2	0.00013733
DGSFGEGLTMK	Q9ULT0	TTC7A	Tetratricopeptide repeat protein 7A	11271	18	2	0.00012669
DHSSQSEEEVVEGEK	O60238	BNIP3L	BCL2/adenovirus E1B 19 kDa protein-interacting protein 3-like	796;797;798	17	2	0.00052256
DLSPQHMVVR	P49590	HARS2	Probable histidine--tRNA ligase, mitochondrial	3236	19	0	1.9332e-05
DLYANTVLSGGTTMYPGIADR	P60709	ACTB	Actin, cytoplasmic 1;Actin, cytoplasmic 1, N-terminally processed;Actin, cytoplasmic 2;Actin, cytoplasmic 2, N-terminally processed	14713	18	1	0.00054106
DMESPTKLDVTLAK	P27816	MAP4	Microtubule-associated protein 4	2601;12792	17	2	0.00040841
DMSPLSETEMALGK	P27816	MAP4	Microtubule-associated protein 4	2602	16	3	0.00012011
DQPDGSSLSPAQSPSQSQPPAASSLR	Q6WCQ1	MPRIP	Myosin phosphatase Rho-interacting protein	6709;6710;6711;6712	17	2	0.00030898
DRASPAAAEEVVPEWASCLK	Q8N3V7	SYNPO	Synaptopodin	7721	16	3	0.00025865
DSGDENEPIQER	Q8WX93	PALLD	Palladin	8315	17	3	0.00048856
DSHSSEEDEASSQTDLSQTISK	Q5JTV8	TOR1AIP1	Torsin-1A-interacting protein 1	5946;5947;5948;5949;5950	17	2	0.00014403
DSLGTYSSR	Q9C0C2	TNKS1BP1	182 kDa tankyrase-1-binding protein	9748	16	5	0.0005151
DSSTSPGDYVLSVSENSR	P46108	CRK	Adapter molecule crk	3002;3003;3004;12890	16	3	0.00013081
DTSPDKGELVSDEEEDT	Q9UPU7	TBC1D2B	TBC1 domain family member 2B	11437;14483	16	3	0.00075971
DVDVSEDSPPPLPER	Q05209	PTPN12	Tyrosine-protein phosphatase non-receptor type 12	4126;4127	19	0	1.9332e-05
DVTPPPETEVVLIK	P27816	MAP4	Microtubule-associated protein 4	12793	17	2	8.9773e-06
EAEEGPTGASESQDSPR	Q5TCZ1	SH3PXD2A	SH3 and PX domain-containing protein 2A	6134;6135	17	2	1.9332e-05
EASPSTLNDK	P54253	ATXN1	Ataxin-1	3516	18	2	2.5834e-05
EDSGTFSLGK	O75569	PRKRA	Interferon-inducible double-stranded RNA-dependent protein kinase activator A	1104;12494	15	4	0.00052977
EENLPDENEEQKQSNQK	O00461	GOLIM4	Golgi integral membrane protein 4	251	18	1	1.2708e-05
EEPVEALTFSR	Q14766	LTBP1	Latent-transforming growth factor beta-binding protein 1	5175;13339	18	4	0.00061157
EGEEPTVYSDEEEPK	O00264	PGRMC1	Membrane-associated progesterone receptor component 1	230;12333	17	2	0.00072411
EGHETPMDIDSDDSK	Q8TDB6	DTX3L	E3 ubiquitin-protein ligase DTX3L	8059;8060	18	2	0.00025471
EGLGQGQSLEQLEALVQTK	Q9NSC5	HOMER3	Homer protein homolog 3	10487	17	2	0.00056178
EGSPAPLEPEPGAAQPK	Q01167	FOXK2	Forkhead box protein K2	3959	19	4	4.3453e-05
ELEEEEENSDEDELDSHTMVK	Q13188	STK3	Serine/threonine-protein kinase 3;Serine/threonine-protein kinase 3 36kDa subunit;Serine/threonine-protein kinase 3 20kDa subunit	4641	16	3	0.00024485
ELSNSPLR	Q9UQ35	SRRM2	Serine/arginine repetitive matrix protein 2	11466;11467	15	4	0.00061157
ELSSEPQTPPAQK	P78559	MAP1A	Microtubule-associated protein 1A;MAP1A heavy chain;MAP1 light chain LC2	3802;3803;13070	18	1	2.625e-05
ELSSPISPK	P78559	MAP1A	Microtubule-associated protein 1A;MAP1A heavy chain;MAP1 light chain LC2	3804;3805;3806	18	2	0.00018123
ENPEESDTETQDHSR	Q9H0X9	OSBPL5	Oxysterol-binding protein-related protein 5	9866;14184	16	3	5.633e-05
ERDTSPDKGELVSDEEEDT	Q9UPU7	TBC1D2B	TBC1 domain family member 2B	11437;14483	18	1	5.633e-05
ERFSPPR	Q9BXP5	SRRT	Serrate RNA effector molecule homolog	9638	16	3	0.00078609
ESSPIPSPTSDR	Q01082	SPTBN1	Spectrin beta chain, non-erythrocytic 1	3928;3929;3930	16	3	0.00042633
ETERASPIK	P27816	MAP4	Microtubule-associated protein 4	2600;12794	18	1	0.00013081
ETERASPIKMDLAPSK	P27816	MAP4	Microtubule-associated protein 4	2600;12794	18	1	0.0005151
EVAATEEDVTRLPSPTSPFSSLSQDQAATSK	Q8WWI1	LMO7	LIM domain only protein 7	8261;8262;8263;13908	18	2	6.269e-05
EVPPPPAEESEEEDDDGLPK	Q9H6X2	ANTXR1	Anthrax toxin receptor 1	10069	19	1	8.6852e-05
FQSLGVAFYR	P51149	RAB7A	Ras-related protein Rab-7a	3383	18	1	0.00015363
FSPTMGR	P78344	EIF4G2	Eukaryotic translation initiation factor 4 gamma 2	3763	16	3	0.00017197
GADNDGSGSESGYTTPK	Q7Z417	NUFIP2	Nuclear fragile X mental retardation-interacting protein 2	7020;7021	18	2	8.9773e-06
GDSPELKPR	Q5VWQ8	DAB2IP	Disabled homolog 2-interacting protein	6232	17	2	0.0001757
GDSPENR	O15027	SEC16A	Protein transport protein Sec16A	436	18	1	2.5834e-05
GEIGGLSLSPSPER	Q96GP6	SCARF2	Scavenger receptor class F member 2	8884	19	3	0.00072803
GELSPSFLNPPLPPSIDDR	P78559	MAP1A	Microtubule-associated protein 1A;MAP1A heavy chain;MAP1 light chain LC2	3809;3810	17	3	0.00010191
GFGGAGELGQTPQVQAALSVSQENPEMEGPER	Q8NBJ4	GOLM1	Golgi membrane protein 1	7833;7834	18	4	0.00064001
GFVPAGESSSEAGGENYK	Q14766	LTBP1	Latent-transforming growth factor beta-binding protein 1	5176;5177;5178	18	1	4.1281e-07
GGAPDPSPGATATPGAPAQPSSPDAR	O95365	ZBTB7A	Zinc finger and BTB domain-containing protein 7A	1375;1376	15	4	0.00011107
GGSGSPGPEPPGRPDGPSLLYR	Q14526	HIC1	Hypermethylated in cancer 1 protein	5106;5107	17	2	0.00021908
GKTPEEIRK	P63208	SKP1	S-phase kinase-associated protein 1	13051	15	4	0.00025471
GPPQSPVFEGVYNNSR	Q8WWM7	ATXN2L	Ataxin-2-like protein	8292	17	2	0.00056346
GSGHPAYAEVEPVGEK	Q6UX71	PLXDC2	Plexin domain-containing protein 2	6673	18	1	4.1896e-05
GSPEEELPLPAFEK	Q5JTD0	TJAP1	Tight junction-associated protein 1	5941	17	2	0.00025755
GSSEEDEDARTPDR	Q8NC56	LEMD2	LEM domain-containing protein 2	7861;7862;13830	18	1	0.00031813
GTPQDLAR	Q9Y490	TLN1	Talin-1	14582	15	4	0.00023098
HAEATLGSGNLR	Q9H8S9	MOB1A;MOB1B	MOB kinase activator 1A;MOB kinase activator 1B	10142;14226	17	3	0.00067131
HLDGEEDGSSDQSQASGTTGGR	Q9UNF1	MAGED2	Melanoma-associated antigen D2	11363;11364	18	2	0.0001757
HQASDSENEELPKPR	Q96ST2	IWS1	Protein IWS1 homolog	9209;9210	15	4	0.00037446
HSDSKEDDGQEIA	Q5ZPR3	CD276	CD276 antigen	6282	17	2	4.3453e-05
HSPVQMNR	Q0JRZ9	FCHO2	F-BAR domain only protein 2	4392	17	2	4.8352e-05
HSTENDSPTNVQQ	P49354	FNTA	Protein farnesyltransferase/geranylgeranyltransferase type-1 subunit alpha	3217;12942	17	3	0.00014928
IACDEEFSDSEDEGEGGRR	Q92769	HDAC2	Histone deacetylase 2	8553;8554	17	3	0.00016418
IDEDGENTQIEDTEPMSPVLNSK	Q12888	TP53BP1	Tumor suppressor p53-binding protein 1	4503	17	2	1.7727e-05
IESDEEEDFENVGK	Q96T23	RSF1	Remodeling and spacing factor 1	9238	16	3	0.00036227
IESPKLER	Q92598	HSPH1	Heat shock protein 105 kDa	8458	17	2	2.3962e-05
IQEQESSGEEDSDLSPEER	Q6NXS1	PPP1R2P3;PPP1R2	Protein phosphatase inhibitor 2-like protein 3;Protein phosphatase inhibitor 2	2901;2902;2903	18	1	0.00028921
IVRGDQPAASGDSDDDEPPPLPR	O00264	PGRMC1	Membrane-associated progesterone receptor component 1	231;232	16	3	0.00040917
IVSAQSLAEDDVE	Q15388	TOMM20	Mitochondrial import receptor subunit TOM20 homolog	5383	16	3	0.00015363
IYHLPDAESDEDEDFKEQTR	Q15019	2019-09-02	Septin-2	5251;14732	18	1	6.5348e-05
KASPEAASTPR	P29590	PML	Protein PML	2655;2656;12810	18	1	0.00019456
KESAPPSLR	Q8WUI4	HDAC7	Histone deacetylase 7	8211	18	2	3.0753e-05
KETPPPLVPPAAR	Q9BQA1	WDR77	Methylosome protein 50	14122	17	2	4.7525e-05
KGDRSPEPGQTWTR	Q09666	AHNAK	Neuroblast differentiation-associated protein AHNAK	4321	18	1	0.00096305
KGNAEGSSDEEGKLVIDEPAK	P51858	HDGF	Hepatoma-derived growth factor	3431;3432	16	3	8.6903e-06
KGSPTPGFSTR	Q6ZRV2	FAM83H	Protein FAM83H	6788	18	1	0.00016418
KQITMEELVR	Q15149	PLEC	Plectin	13368	17	3	0.00018123
KQSQQLELLESELR	O60486	PLXNC1	Plexin-C1	872	18	2	0.00030556
KTGSYGALAEITASK	O14974	PPP1R12A	Protein phosphatase 1 regulatory subunit 12A	399;12365	19	2	5.4404e-05
KYSSCSTIFLDDSTVSQPNLK	Q8ND76	CCNY	Cyclin-Y	7884;7885;7886;13837	16	5	0.00010314
LASDDRPSPPR	P98175	RBM10	RNA-binding protein 10	3887;3888	17	2	0.00056346
LDIDSPPITAR	P14618	PKM	Pyruvate kinase PKM	2087	19	2	3.8776e-05
LEISPDSSPER	Q99959	PKP2	Plakophilin-2	9379;9380;9381	19	0	0.00023407
LHSSNPNLSTLDFGEEK	Q9H4L5	OSBPL3	Oxysterol-binding protein-related protein 3	10015;10016	19	0	0.00072803
LLDAEDVDVPSPDEK	Q9UPN3	MACF1	Microtubule-actin cross-linking factor 1, isoforms 1/2/3/5	11390	18	1	5.5918e-05
LLEENETEAVTVPTPSPTPVR	Q9UHR4	BAIAP2L1	Brain-specific angiogenesis inhibitor 1-associated protein 2-like protein 1	11051;14402;14403	18	1	1.3681e-05
LLESSLSSSEGEEPVEYK	P08648	ITGA5	Integrin alpha-5;Integrin alpha-5 heavy chain;Integrin alpha-5 light chain	1814;1815;1816;1817;1818	16	3	0.00069598
LLHEDLDESDDDMDEK	O43150	ASAP2	Arf-GAP with SH3 domain, ANK repeat and PH domain-containing protein 2	589	17	2	0.00015363
LMLSTSEYSQSPK	Q12888	TP53BP1	Tumor suppressor p53-binding protein 1	4505;4506	19	1	8.343e-05
LNEQASEEILK	Q01105	SET	Protein SET	3945	18	3	0.00015888
LPDSDDDEDEETAIQR	Q96K21	ZFYVE19	Abscission/NoCut checkpoint regulator	9000	17	2	0.00052977
LPLQESEEEEREER	P23497	SP100	Nuclear autoantigen Sp-100	2507	18	2	0.00025471
LPQLVGVSTPLQGGSNSAAAIGQSSGELR	P15291	B4GALT1	Beta-1,4-galactosyltransferase 1;Lactose synthase A protein;N-acetyllactosamine synthase;Beta-N-acetylglucosaminylglycopeptide beta-1,4-galactosyltransferase;Beta-N-acetylglucosaminyl-glycolipid beta-1,4-galactosyltransferase;Processed beta-1,4-galactosyltransferase 1	2110;2111	17	4	0.00010314
LPSPTSPFSSLSQDQAATSK	Q8WWI1	LMO7	LIM domain only protein 7	8261;8262;8263;13908	18	2	4.149e-05
LQSIGTENTEENR	P04075	ALDOA	Fructose-bisphosphate aldolase A	1618;12597	17	2	0.00048173
LSLEGDHSTPPSAYGSVK	P07355	ANXA2	Annexin A2;Putative annexin A2-like protein	1761;1762;1763;12631;14687	18	1	1.5475e-05
LSPSPTSQR	P02545	LMNA	Prelamin-A/C;Lamin-A/C	1563;1564;1565;12580	18	1	3.8683e-06
LSQETEALGR	Q02818	NUCB1	Nucleobindin-1	4016	17	3	0.00024485
LSSGFDDIDLPSAVK	Q9Y446	PKP3	Plakophilin-3	11859;11860	17	3	0.00021069
LSSPVLHR	Q16643	DBN1	Drebrin	5575;5576	18	1	0.00013041
LSSSSSNDSGNK	Q09666	AHNAK	Neuroblast differentiation-associated protein AHNAK	4359;4360	17	3	0.00024485
LTFDSSFSPNTGK	P21796	VDAC1	Voltage-dependent anion-selective channel protein 1	2457	16	3	0.00060434
LTVENSPK	O43583	DENR	Density-regulated protein	730;12433	17	2	0.00030635
LTVENSPKQEAGISEGQGTAGEEEEK	O43583	DENR	Density-regulated protein	730;12433	17	2	0.00021597
MAPTPIPTRSPSDSSTASTPVAEQIER	Q16643	DBN1	Drebrin	5577;5578;5579;5580;5581;13421;13422;13423;13424	16	3	3.8683e-06
MEPAPARSPR	P29590	PML	Protein PML	2665	17	2	3.9395e-05
METVSNASSSSNPSSPGR	Q9NTI5	PDS5B	Sister chromatid cohesion protein PDS5 homolog B	10516;10517;10518;10519;10520;10521;10522	17	2	0.00016904
MSLPDVDLDLK	Q09666	AHNAK	Neuroblast differentiation-associated protein AHNAK	4364	17	3	0.00063324
MYSFDDVLEEGK	Q8WWI1	LMO7	LIM domain only protein 7	8267	17	3	0.00068878
NAEREQESEEEM	Q9NWC5	TMEM45A	Transmembrane protein 45A	10585	18	3	0.00060759
NASASFQELEDK	Q99543	DNAJC2	DnaJ homolog subfamily C member 2;DnaJ homolog subfamily C member 2, N-terminally processed	9295;9296	16	3	0.00068878
NFSDNQLQEGK	P37802	TAGLN2	Transgelin-2	2857	16	3	0.00039387
NLSNEELTK	Q0JRZ9	FCHO2	F-BAR domain only protein 2	4396	18	1	0.00027273
NLSSEEVARPR	Q9BQI5	SGIP1	SH3-containing GRB2-like protein 3-interacting protein 1	9416	19	1	0.00026142
NNTAAETEDDESDGEDRGGGTSGSLR	Q6KC79	NIPBL	Nipped-B-like protein	6506	15	4	0.00080411
NQSPTEAEKPASSSLPSSPPPQLLTR	Q99567	NUP88	Nuclear pore complex protein Nup88	9301;9302;9303;9304;9305;9306;14108	17	2	0.000103
NSPEDLGLSLTGDSCK	Q12888	TP53BP1	Tumor suppressor p53-binding protein 1	4510;4511	17	2	0.00018551
NSSEASSGDFLDLK	Q9UK76	HN1	Hematological and neurological expressed 1 protein;Hematological and neurological expressed 1 protein, N-terminally processed	11134;11135	17	3	0.00025254
NVSESPNR	Q13427	PPIG	Peptidyl-prolyl cis-trans isomerase G	4744;4745	17	2	0.00011609
PADTPPAPSPPPTPAPVPVPLPPSTPAPVPVSK	Q12929	EPS8	Epidermal growth factor receptor kinase substrate 8	4555;13204	17	3	0.00085259
PASPGPSLPAR	Q8IY33	MICALL2	MICAL-like protein 2	7521	19	0	8.9773e-06
PFSAPKPQTSPSPK	Q01518	CAP1	Adenylyl cyclase-associated protein 1	3981;3982;3983;13105	18	1	0.00024485
PISPSPSAILER	Q5T5P2	KIAA1217	Sickle tail protein homolog	6088	17	2	0.00013947
PLPSPPK	P56945	BCAR1	Breast cancer anti-estrogen resistance protein 1	3603	18	1	2.5989e-06
PLTSPLR	P48634	PRRC2A	Protein PRRC2A	3152;12924	17	2	0.00023098
PRPEAEPPSPPSGDLR	Q8WUA7	TBC1D22A	TBC1 domain family member 22A	8183	16	3	0.00054971
QDVDNASLAR	P08670	VIM	Vimentin	1827	16	3	0.00080387
QEPLEEDSPSSSSAGLDK	P15408	FOSL2	Fos-related antigen 2	2127	18	6	0.00096782
QGSFSEDVISHK	Q9UPN3	MACF1	Microtubule-actin cross-linking factor 1, isoforms 1/2/3/5	11394	19	0	6.5348e-05
QNSDPTSENPPLPTR	Q9UKE5	TNIK	TRAF2 and NCK-interacting protein kinase	11146;14422	18	1	3.0582e-05
QNSSSSDSGGSIVR	Q12929	EPS8	Epidermal growth factor receptor kinase substrate 8	4556;4557;4558;4559	18	1	5.3741e-05
QPSEEEIIK	Q15121	PEA15	Astrocytic phosphoprotein PEA-15	5298	17	2	0.00019998
QPSPSPSPTER	P29590	PML	Protein PML	2668;2669;2670	18	1	1.2708e-05
QQSVESLAEEVK	Q8WXH0	SYNE2	Nesprin-2	8351	16	5	0.00092827
QSPGPALAR	P85037	FOXK1	Forkhead box protein K1	3857	16	3	0.00042633
QSSPSGSEQLVR	O15231	ZNF185	Zinc finger protein 185	531;532	17	2	0.00054106
QVSASELHTSGILGPETLR	P58107	EPPK1	Epiplakin	3627;3628	18	1	0.00012969
RAEDGSVIDYELIDQDAR	P07355	ANXA2	Annexin A2	1759;14685	19	0	2.6637e-05
RAESMLQQADK	P13797	PLS3	Plastin-3	2062	18	3	2.9569e-05
RAGDLLEDSPK	P51858	HDGF	Hepatoma-derived growth factor	3430	17	2	0.00010314
RASFAEK	Q15149	PLEC	Plectin	5326	19	0	8.9773e-06
REDSPGPEVQPMDK	O75382	TRIM3	Tripartite motif-containing protein 3	1046	17	2	4.8352e-05
REEDEPEERSGDETPGSEVPGDK	Q1KMD3	HNRNPUL2	Heterogeneous nuclear ribonucleoprotein U-like protein 2	5605;5606;13429	16	3	0.00093767
RGESLDNLDSPR	Q8WWI1	LMO7	LIM domain only protein 7	8264;8265	17	2	0.00034621
RGSGHPAYAEVEPVGEK	Q6UX71	PLXDC2	Plexin domain-containing protein 2	6673	18	1	0.00012669
RGSLGEEGSEPPPPPPLPLAR	Q14934	NFATC4	Nuclear factor of activated T-cells, cytoplasmic 4	5212	17	5	0.00093846
RGSLSNAGDPEIVK	O43847	NRD1	Nardilysin	777	16	3	4.1365e-05
RGSTTSIPSPQSDGGDPNQPDDR	Q8IYB1	MB21D2	Protein MB21D2	7536;7537;13766	18	3	0.00038872
RIDISPSTLR	Q9NYF8	BCLAF1	Bcl-2-associated transcription factor 1	10640;10641	17	2	0.00015363
RIDSFVK	Q96CC6	RHBDF1	Inactive rhomboid protein 1	8769	18	2	0.00024485
RKPSPEPEGEVGPPK	Q7Z5L9	IRF2BP2	Interferon regulatory factor 2-binding protein 2	7080	16	3	0.00067131
RLSPAER	P41212	ETV6	Transcription factor ETV6	2894	16	3	0.00098785
RNSSEASSGDFLDLK	Q9UK76	HN1	Hematological and neurological expressed 1 protein;Hematological and neurological expressed 1 protein, N-terminally processed	11134;11135	18	1	1.4616e-05
RPSESDKEDELDK	Q02952	AKAP12	A-kinase anchor protein 12	4052;4053	15	4	0.00080434
RPSGTGTGPEDGRPSLGSPYGQPPR	P50479	PDLIM4	PDZ and LIM domain protein 4	3337;3338;3339;12967;12968	18	2	4.9389e-05
RPSQEQSASASSGQPQAPLNR	Q5T1M5	FKBP15	FK506-binding protein 15	6027;6028;6029	17	2	0.00040122
RSPPAPGLQPMR	P15408	FOSL2	Fos-related antigen 2	2128	18	1	0.00031972
RSSPVPPVPER	Q6ZRV2	FAM83H	Protein FAM83H	6793;6794	17	2	0.0005068
RSSQPSPTAVPASDSPPTK	Q3KQU3	MAP7D1	MAP7 domain-containing protein 1	5705;5706;5707;5708;5709;13452	18	1	5.633e-05
RSSSDLITLPATTPPCPTK	Q5TCZ1	SH3PXD2A	SH3 and PX domain-containing protein 2A	6141;6142;6143	16	3	0.0004169
RTPSDDEEDNLFAPPK	Q9Y4E1	FAM21A	WASH complex subunit FAM21A;WASH complex subunit FAM21C	6324;13552	17	2	0.00011449
SAFTPATATGSSPSPVLGQGEK	Q15811	ITSN1	Intersectin-1	5494;5495;5496;13398;13399	16	3	1.8422e-05
SAPASPTHPGLMSPR	P85037	FOXK1	Forkhead box protein K1	3858;3859;3860;13080	18	1	3.9395e-05
SASADNLTLPR	Q8ND76	CCNY	Cyclin-Y	7887;7888	17	2	8.698e-06
SASMKLPDNTVK	O00515	LAD1	Ladinin-1	274;275	16	3	0.00068095
SASVNKEPVSLPGIMR	Q8WWI1	LMO7	LIM domain only protein 7	8268;8269	18	1	1.6272e-05
SAVLLVDETATTPIFANR	Q12802	AKAP13	A-kinase anchor protein 13	4457	16	5	0.00088016
SDEFSLADALPEHSPAK	Q8NDC0	MAPK1IP1L	MAPK-interacting and spindle-stabilizing protein-like	7890;7891	18	1	7.55e-05
SDEGQLSPATR	Q15149	PLEC	Plectin	5312;13364	18	1	7.6814e-07
SDQEAKPSTEDLGDK	P63165	SUMO1	Small ubiquitin-related modifier 1	3711	17	2	0.00064104
SDSDSSTLPR	Q9ULE0	WWC3	Protein WWC3	11230;11231	18	1	3.801e-06
SDSRAQAVSEDAGGNEGR	P55884	EIF3B	Eukaryotic translation initiation factor 3 subunit B	3581;3582	17	3	0.00043716
SEKSVEAAAELSAK	P20962	PTMS	Parathymosin	2394;2395	17	2	0.00069598
SESMPVQLNK	Q92609	TBC1D5	TBC1 domain family member 5	8473	18	1	2.5943e-06
SESPKEPEQLRK	P09651	HNRNPA1	Heterogeneous nuclear ribonucleoprotein A1;Heterogeneous nuclear ribonucleoprotein A1, N-terminally processed	1863;1864	17	2	0.00018865
SESPPPLSDPK	Q15059	BRD3	Bromodomain-containing protein 3	5289	17	2	0.00025471
SETSPVAPR	Q9Y4G8	RAPGEF2	Rap guanine nucleotide exchange factor 2	11964	18	1	0.00016418
SFADIGK	Q9Y6M7	SLC4A7	Sodium bicarbonate cotransporter 3;Sodium-driven chloride bicarbonate exchanger	12137	17	4	0.00061157
SFAGNLNTYK	Q01813	PFKP	ATP-dependent 6-phosphofructokinase, platelet type	3990	18	1	0.00014403
SFGSPNR	P50613	CDK7	Cyclin-dependent kinase 7	3357	17	2	0.0007311
SFLSEPSSPGR	Q69YN4	KIAA1429	Protein virilizer homolog	6402;6403	17	2	0.0006831
SFSADNFIGIQR	Q8N7R7	CCNYL1	Cyclin-Y-like protein 1	7801;7802	15	4	7.0196e-05
SFSEDTLMDGPAR	Q9BRG2	SH2D3A	SH2 domain-containing protein 3A	9446;9447	15	4	0.00075971
SGGGDLTLGLEPSEEEAPR	P04626	ERBB2	Receptor tyrosine-protein kinase erbB-2	1636;1637;12603	17	2	0.00013133
SGGLQTPECLSR	P85037	FOXK1	Forkhead box protein K1	3861;13081	16	3	0.00025311
SGSEEAVTDPGER	Q92508	PIEZO1	Piezo-type mechanosensitive ion channel component 1	8403;8404	17	2	0.00024485
SGYIPSGHSLGTPEPAPR	Q9HBL0	TNS1	Tensin-1	10242;14769	17	3	0.00035174
SHSDTSIASR	Q92622	KIAA0226	Run domain Beclin-1 interacting and cysteine-rich containing protein	8517;8518	17	3	0.00023407
SHSPSASQSGSQLR	Q8WWI1	LMO7	LIM domain only protein 7	8270;8271	17	2	7.0196e-05
SHSSPSLNPDTSPITAK	Q9NYI0	PSD3	PH and SEC7 domain-containing protein 3	10650;10651;10652;10653;10654;14338	16	3	6.6848e-05
SHSSSEAYEPR	Q8IVF2	AHNAK2	Protein AHNAK2	7428;7429	16	3	9.4408e-05
SISSSNPDLAVAPGSVDDEVSR	Q96HP0	DOCK6	Dedicator of cytokinesis protein 6	8914;8915;8916;8917	18	1	0.00016418
SLDMDSIIAEVK	P05787	KRT8	Keratin, type II cytoskeletal 8	141;142	17	2	0.00016387
SLDSEPSVPSAAKPPSPEK	Q7Z3K3	POGZ	Pogo transposable element with ZNF domain	7000;7001	17	2	0.00079211
SLENPTPPFTPK	O15085	ARHGEF11	Rho guanine nucleotide exchange factor 11	501;12389	17	2	3.801e-06
SLGGESSGGTTPVGSFHTEAAR	O15085	ARHGEF11	Rho guanine nucleotide exchange factor 11	502;503;504;12390;12391	18	1	0.00025471
SLSNSNPDISGTPTSPDDEVR	Q96N67	DOCK7	Dedicator of cytokinesis protein 7	9052;9053;9054;9055	18	1	8.9829e-08
SLSPEDAESLSVLSVPSPDTANQEPTPK	P78559	MAP1A	Microtubule-associated protein 1A;MAP1A heavy chain;MAP1 light chain LC2	3818;3819	19	1	2.5834e-05
SNSTETLSPAK	Q9P0K1	ADAM22	Disintegrin and metalloproteinase domain-containing protein 22	10716;14351	16	4	0.00016418
SPAVATSTAAPPPPSSPLPSK	Q14157	UBAP2L	Ubiquitin-associated protein 2-like	5016;5017;13303;13304	16	3	0.00078828
SPEAVGPELEAEEK	Q96N64	PWWP2A	PWWP domain-containing protein 2A	9046	17	2	0.00081606
SPEGPREEEAAGGEEESPDSSPHGEASR	Q96NY7	CLIC6	Chloride intracellular channel protein 6	9067	16	4	0.00054474
SPFSVAVSPSLDLSK	P21333	FLNA	Filamin-A	2430;2431;2432	18	2	0.000418
SPILLPK	Q8TD16	BICD2	Protein bicaudal D homolog 2	8039	17	2	0.00016516
SPPAPGLQPMR	P15408	FOSL2	Fos-related antigen 2	2128	18	1	1.7958e-05
SPPGSGASTPVGPWDQAVQR	Q8TE77	SSH3	Protein phosphatase Slingshot homolog 3	8103;8104;8105;13885	16	4	0.00092827
SPSDSSTASTPVAEQIER	Q16643	DBN1	Drebrin	5577;5578;5579;5580;5581;13423;13424	17	2	7.1434e-05
SPSFGDPQLSPEAR	O95425	SVIL	Supervillin	1400;1401;1402	16	3	0.0005151
SPSGHPHVR	Q8WX93	PALLD	Palladin	8329;8330	18	1	0.00036227
SPSLSLAPLSPR	Q969H4	CNKSR1	Connector enhancer of kinase suppressor of ras 1	8654;8655;8656	19	0	4.3453e-05
SPSPSFR	P49585	PCYT1A	Choline-phosphate cytidylyltransferase A	3223;3224;3225	15	4	0.00078027
SPSPVLR	O43432	EIF4G3	Eukaryotic translation initiation factor 4 gamma 3	684;685	18	2	5.3741e-05
SQDATFSPGSEQAEKSPGPIVSR	Q86WB0	ZC3HC1	Nuclear-interacting partner of ALK	7309;7310;13725	15	4	0.00098785
SQSADAPGPTER	Q9NSC5	HOMER3	Homer protein homolog 3	10488;10489	17	2	0.00012669
SQSLPNSLDYTQTSDPGR	Q96TC7	RMDN3	Regulator of microtubule dynamics protein 3	9274;9275	18	1	5.633e-05
SQSLPTTLLSPVR	P28290	SSFA2	Sperm-specific antigen 2	2622;2623;2624;12801	15	4	0.00065904
SQSVPGAWPGASPLSSQPLSGSSR	Q9HBL0	TNS1	Tensin-1	10247;10248	17	2	9.7917e-05
SRDATPPVSPINMEDQER	P17275	JUNB	Transcription factor jun-B	2232;2233;12723	18	2	0.00098387
SRDSGDENEPIQER	Q8WX93	PALLD	Palladin	8315;8331	17	2	0.00017889
SRESLNVDVVK	Q07866	KLC1	Kinesin light chain 1	4212;4213	19	0	0.00016387
SSFSQHAR	P02545	LMNA	Prelamin-A/C;Lamin-A/C	1572;1573	18	3	0.00028825
SSGASASALQR	P50151	GNG10	Guanine nucleotide-binding protein G(I)/G(S)/G(O) subunit gamma-10	3322;3323;3324	18	1	7.5088e-05
SSLSGDEEDELFK	Q5T1M5	FKBP15	FK506-binding protein 15	6032;6033;6034	18	1	0.00070977
SSPELLPSGVTDENEVTTAVTEK	P42566	EPS15	Epidermal growth factor receptor substrate 15	2937;2938	18	1	0.00027273
SSPEQPRPSTSK	P29590	PML	Protein PML	2662;2663;2664	17	3	0.00054575
SSPVPPVPER	Q6ZRV2	FAM83H	Protein FAM83H	6793;6794	18	2	0.00037261
SSSESYTQSFQSR	Q9BTU6	PI4K2A	Phosphatidylinositol 4-kinase type 2-alpha	9501;9502;9503	18	2	3.9758e-05
SSSLGNLK	Q86W92	PPFIBP1	Liprin-beta-1	7300	16	4	0.00069221
SSSLGNLKK	Q86W92	PPFIBP1	Liprin-beta-1	7300	17	3	0.00041578
SSSPAGETEGDREPQAR	Q9BTC0	DIDO1	Death-inducer obliterator 1	9489;9490;9491	16	3	0.00072803
SSSSDSIHSVR	Q8WYL5	SSH1	Protein phosphatase Slingshot homolog 1	8373;8374;8375;8376	17	2	0.00072803
SSSVGSSSSYPISPAVSR	Q15149	PLEC	Plectin	5333;5334;5335;5336;5337;5338;5339;5340;5341	18	1	0.000245
STFREESPLR	Q9NYF8	BCLAF1	Bcl-2-associated transcription factor 1	10637	17	2	0.00010314
STPFIVPSSPTEQEGR	Q12888	TP53BP1	Tumor suppressor p53-binding protein 1	4525	16	3	0.00040052
STSPIIGSPPVR	Q86TB9	PATL1	Protein PAT1 homolog 1	7156;7157;13696	16	3	0.00023407
STTPPPAEPVSLPQEPPK	Q9UN86	G3BP2	Ras GTPase-activating protein-binding protein 2	11359;14467;14468	17	2	0.00024993
SVSLQEPR	Q6PJF5	RHBDF2	Inactive rhomboid protein 2	6619;6620	18	1	0.00021865
SVSLSMR	O60238	BNIP3L	BCL2/adenovirus E1B 19 kDa protein-interacting protein 3-like	802	17	2	0.00016418
SYDVPPPPMEPDHPFYSNISK	P18669	PGAM1	Phosphoglycerate mutase 1;Probable phosphoglycerate mutase 4	2318	18	1	8.6852e-05
SYSLSELSVLQAK	Q9P0V3	SH3BP4	SH3 domain-binding protein 4	10734	17	2	8.9773e-06
SYSSPDITQAIQEEEKR	P40818	USP8	Ubiquitin carboxyl-terminal hydrolase 8	2883;2884;2885	18	1	0.00016384
TASEINFDK	Q9Y4K4	MAP4K5	Mitogen-activated protein kinase kinase kinase kinase 5	11995	17	5	0.00024993
TASELLLDR	Q92508	PIEZO1	Piezo-type mechanosensitive ion channel component 1	8405	17	2	0.00021069
TCSLPDLSK	Q96PY6	NEK1	Serine/threonine-protein kinase Nek1	9120	16	4	0.00015363
TEAQDLCRASPEPPGPESSSR	Q9C0C2	TNKS1BP1	182 kDa tankyrase-1-binding protein	9747;14173	15	4	0.00087657
TESGEETDLISPPQEEVK	O43493	TGOLN2	Trans-Golgi network integral membrane protein 2	713;12429	18	1	1.3681e-05
TESPATAAETASEELDNR	Q9NTJ3	SMC4	Structural maintenance of chromosomes protein 4	10526;14310;14311	17	2	0.00024993
TIGGGDDSFNTFFSETGAGK	P68363	TUBA1B	Tubulin alpha-1B chain;Tubulin alpha-1C chain;Tubulin alpha-1A chain;Tubulin alpha-3E chain	3726;13053	18	3	0.00076677
TLSDESIYNSQR	O43166	SIPA1L1	Signal-induced proliferation-associated 1-like protein 1	609;12414	19	2	3.2795e-05
TLSPEFNER	Q9BSJ8	ESYT1	Extended synaptotagmin-1	9473	19	0	3.0582e-05
TMTTNSSDPFLNSGTYHSR	P46937	YAP1	Transcriptional coactivator YAP1	3097;3098;12913;12914;12915	18	2	5.9941e-05
TPASTPVSGTPQASPMIER	Q9UHR4	BAIAP2L1	Brain-specific angiogenesis inhibitor 1-associated protein 2-like protein 1	11054;11055;11056;14404;14405	18	2	0.00098785
TPNNVVSTPAPSPDASQLASSLSSQK	Q8WWI1	LMO7	LIM domain only protein 7	8280;8281;13912	18	1	1.6272e-05
TPSPESHR	Q66K74	MAP1S	Microtubule-associated protein 1S;MAP1S heavy chain;MAP1S light chain	6353;13562	18	1	0.00010014
TQTPPVSPAPQPTEER	Q14247	CTTN	Src substrate cortactin	5068;13323;13324	17	2	0.00056346
TSSKESSPIPSPTSDR	Q01082	SPTBN1	Spectrin beta chain, non-erythrocytic 1	3928;3929;3930;3943;3944;13098	18	1	6.027e-05
TSSVVTLEVAK	P55196	MLLT4	Afadin	3562	18	2	0.00023407
TSVLGGGEDGIEPVSPPEGMTEPGHSR	Q9Y618	NCOR2	Nuclear receptor corepressor 2	12087	17	2	5.3014e-05
TYSDEANQMR	Q9BXF6	RAB11FIP5	Rab11 family-interacting protein 5	9625;14156	17	2	0.00046513
VAAAAGSGPSPPGSPGHDR	Q9BTU6	PI4K2A	Phosphatidylinositol 4-kinase type 2-alpha	9504;9505;9506	17	2	0.00039387
VEQALSEVASSLQSSAPK	Q86TV6	TTC7B	Tetratricopeptide repeat protein 7B	7178;7179;7180;7181	16	3	0.00075971
VESFEDR	Q6ZNL6	FGD5	FYVE, RhoGEF and PH domain-containing protein 5	6774	17	2	0.00019181
VGSLDNVGHLPAGGAVK	P27816	MAP4	Microtubule-associated protein 4	2610	18	1	0.0005151
VKEEPPSPPQSPR	Q00613	HSF1	Heat shock factor protein 1	3912;3913	17	2	0.00028921
VPKPEPIPEPKEPSPEK	Q8IYB3	SRRM1	Serine/arginine repetitive matrix protein 1	7547	17	2	0.00069598
VPPPRSPQAQEAPVNIDEGLTGCTIQLLPAQDK	P78559	MAP1A	Microtubule-associated protein 1A;MAP1A heavy chain;MAP1 light chain LC2	3829	16	3	0.00049882
VPSSDEEVVEEPQSR	Q9C0C2	TNKS1BP1	182 kDa tankyrase-1-binding protein	9773;9774	17	2	0.000103
VQEKPDSPGGSTQIQR	Q13459	MYO9B	Unconventional myosin-IXb	4798	18	1	0.00013363
VQNHLPASGPTQPPVVSSTNEGSPSPPEPTGK	O43294	TGFB1I1	Transforming growth factor beta-1-induced transcript 1 protein	638;639;640;641;12418	18	1	0.00061157
VQTTPPPAVQGQK	Q2M2I8	AAK1	AP2-associated protein kinase 1	13443;13444	17	2	0.00050768
VSEEQTQPPSPAGAGMSTAMGR	Q16666	IFI16	Gamma-interferon-inducible protein 16	5586;13426	17	2	0.00078828
VSGPDLDLNLK	Q09666	AHNAK	Neuroblast differentiation-associated protein AHNAK	4377	16	6	0.00059362
VSPPAPGSAPETPEDK	Q13459	MYO9B	Unconventional myosin-IXb	4799;4800;13250	17	2	0.00029749
VSPSTSYTPSR	Q9BTE3	MCMBP	Mini-chromosome maintenance complex-binding protein	9497	17	4	0.00068095
VSVTPPEESQNSDTPPRPDR	Q05209	PTPN12	Tyrosine-protein phosphatase non-receptor type 12	4134;13133	16	4	0.00012246
VVPSFLPVDQGGSLVGR	Q14126	DSG2	Desmoglein-2	4986;4987	16	3	0.00039069
VYEDSGIPLPAESPK	Q8IXM2	BAP18	Chromatin complexes subunit BAP18	7505	18	1	9.4408e-05
YGLQDSDEEEEEHPSK	P52948	NUP98	Nuclear pore complex protein Nup98-Nup96;Nuclear pore complex protein Nup98;Nuclear pore complex protein Nup96	3477;14711	16	3	0.0006501
YLSFTPPEK	Q13177	PAK2	Serine/threonine-protein kinase PAK 2;PAK-2p27;PAK-2p34	4635;13223	17	2	0.00055535
YSGAYGASVSDEELK	Q9NX63	CHCHD3	MICOS complex subunit MIC19	10611	17	2	0.00024993
YSSDEDLPSK	P55008	AIF1	Allograft inflammatory factor 1	3541;3542	18	2	0.00078093
