# Supplementary material for: Integrated proteomics and phosphoproteomics reveal perturbed regulative pathways in pancreatic ductal adenocarcinoma
Source: Royal Society of Chemistry journal article supplement (doi:10.1039/d0mo00125b), 2020-12-23
Supplement: d0mo00125b1.zip [file Table S4. KEGG and Reactome pathways relevant to the dysregulated proteins.xlsx]

## Sheet: enrichment.RCTM
Reactome Pathways
#term ID	term description	observed gene count	background gene count	false discovery rate	matching proteins in your network (IDs)	matching proteins in your network (labels)
HSA-1474244	Extracellular matrix organization	46	298	7.36e-26	ENSP00000196061,ENSP00000216286,ENSP00000218388,ENSP00000219070,ENSP00000222271,ENSP00000222399,ENSP00000223061,ENSP00000223127,ENSP00000225964,ENSP00000230538,ENSP00000231061,ENSP00000236040,ENSP00000236671,ENSP00000260356,ENSP00000261023,ENSP00000261978,ENSP00000263556,ENSP00000264144,ENSP00000265077,ENSP00000282903,ENSP00000293379,ENSP00000295006,ENSP00000296181,ENSP00000296585,ENSP00000297268…	ASPN,BGN,CAPN2,COL12A1,COL1A1,COL1A2,COL3A1,COL5A1,COMP,CRTAP,CTSB,CTSD,CTSL,EFEMP1,EFEMP2,FBLN1,FBLN2,FMOD,HSPG2,ITGA2,ITGA5,ITGAV,ITGB5,LAMA3,LAMA4,LAMB1,LAMB3,LAMC2,LEPRE1,LTBP1,LTBP2,MMP14,MMP2,NID2,P4HA1,P4HA2,PCOLCE,PLEC,PLOD1,PLOD2,PLOD3,SERPINH1,SPARC,THBS1,TIMP1,VCAN
HSA-1474290	Collagen formation	20	89	3.28e-13	ENSP00000196061,ENSP00000223061,ENSP00000223127,ENSP00000225964,ENSP00000236040,ENSP00000263556,ENSP00000264144,ENSP00000282903,ENSP00000297268,ENSP00000304408,ENSP00000323696,ENSP00000323856,ENSP00000324532,ENSP00000325146,ENSP00000345344,ENSP00000345672,ENSP00000360882,ENSP00000375778,ENSP00000384999,ENSP00000434412	COL12A1,COL1A1,COL1A2,COL3A1,COL5A1,CRTAP,CTSB,CTSL,LAMA3,LAMB3,LAMC2,LEPRE1,P4HA1,P4HA2,PCOLCE,PLEC,PLOD1,PLOD2,PLOD3,SERPINH1
HSA-168256	Immune System	79	1925	1.03e-11	ENSP00000218388,ENSP00000219070,ENSP00000225964,ENSP00000227266,ENSP00000228825,ENSP00000228928,ENSP00000229795,ENSP00000233057,ENSP00000236671,ENSP00000242786,ENSP00000247470,ENSP00000253413,ENSP00000254301,ENSP00000261023,ENSP00000261416,ENSP00000261667,ENSP00000263097,ENSP00000268182,ENSP00000271638,ENSP00000287156,ENSP00000291568,ENSP00000293362,ENSP00000294742,ENSP00000296181,ENSP00000296370…	ACAA1,ACTR2,ALAD,ANXA2,AP2A1,AP2B1,ARPC3,ARPC4,ARPC5,ATOX1,ATP6V1E1,CAP1,CD36,CD97,CDA,CFL1,CNN2,COL1A1,COL1A2,COL3A1,CSTB,CTSB,CTSC,CTSD,CTSE,CTSL,EIF2AK2,ENSG00000258947,FLNA,FLNB,GSTP1,HBB,HEXB,HSP90AA1,HSP90AB1,IFI30,IFIT3,IQGAP1,ISG15,ITGAV,ITGB5,ITPR3,KLC1,KPNA3,LGALS3,LGALS9,LMO7,LRRFIP1,MAPK14,MMP2,MRC2,MVP,MX1,OAS2,OAS3,PKM,PPP2R1A,PPP3CA,PRDX6,PSME3,PSMF1,PTPN1,PYCARD,QSOX1,RAB31,RAB5C,…
HSA-3000178	ECM proteoglycans	17	75	2.2e-11	ENSP00000222271,ENSP00000222399,ENSP00000225964,ENSP00000230538,ENSP00000231061,ENSP00000261023,ENSP00000265077,ENSP00000296181,ENSP00000296585,ENSP00000297268,ENSP00000304408,ENSP00000324532,ENSP00000327336,ENSP00000347041,ENSP00000360882,ENSP00000363827,ENSP00000364694	ASPN,BGN,COL1A1,COL1A2,COL3A1,COL5A1,COMP,FMOD,HSPG2,ITGA2,ITGAV,ITGB5,LAMA3,LAMA4,LAMB1,SPARC,VCAN
HSA-6798695	Neutrophil degranulation	34	471	3.65e-10	ENSP00000227266,ENSP00000229795,ENSP00000236671,ENSP00000242786,ENSP00000247470,ENSP00000254301,ENSP00000261023,ENSP00000261416,ENSP00000263097,ENSP00000268182,ENSP00000271638,ENSP00000291568,ENSP00000294742,ENSP00000296370,ENSP00000320171,ENSP00000333664,ENSP00000333994,ENSP00000335153,ENSP00000342026,ENSP00000345672,ENSP00000346032,ENSP00000347872,ENSP00000356574,ENSP00000360609,ENSP00000361883…	ACAA1,ACTR2,ALAD,ANXA2,ARPC5,CAP1,CD36,CD97,CDA,CNN2,CSTB,CTSB,CTSC,CTSD,GSTP1,HBB,HEXB,HSP90AA1,HSP90AB1,IQGAP1,ITGAV,LGALS3,MAPK14,MVP,PKM,PRDX6,PYCARD,QSOX1,RAB31,RAB5C,S100A11,S100P,TOM1,VAT1
HSA-168249	Innate Immune System	50	1012	1.08e-09	ENSP00000227266,ENSP00000228825,ENSP00000229795,ENSP00000236671,ENSP00000242786,ENSP00000247470,ENSP00000253413,ENSP00000254301,ENSP00000261023,ENSP00000261416,ENSP00000263097,ENSP00000268182,ENSP00000271638,ENSP00000287156,ENSP00000291568,ENSP00000293362,ENSP00000294742,ENSP00000296370,ENSP00000320171,ENSP00000324804,ENSP00000333664,ENSP00000333994,ENSP00000335153,ENSP00000338039,ENSP00000342026…	ACAA1,ACTR2,ALAD,ANXA2,ARPC3,ARPC4,ARPC5,ATOX1,ATP6V1E1,CAP1,CD36,CD97,CDA,CFL1,CNN2,CSTB,CTSB,CTSC,CTSD,CTSL,GSTP1,HBB,HEXB,HSP90AA1,HSP90AB1,IQGAP1,ISG15,ITGAV,ITPR3,LGALS3,LRRFIP1,MAPK14,MVP,PKM,PPP2R1A,PPP3CA,PRDX6,PSME3,PSMF1,PYCARD,QSOX1,RAB31,RAB5C,RELA,S100A11,S100P,TOM1,TXN,UBE2L6,VAT1
HSA-3000171	Non-integrin membrane-ECM interactions	14	58	1.08e-09	ENSP00000222399,ENSP00000225964,ENSP00000230538,ENSP00000260356,ENSP00000261023,ENSP00000264144,ENSP00000296181,ENSP00000296585,ENSP00000297268,ENSP00000304408,ENSP00000324532,ENSP00000360882,ENSP00000363827,ENSP00000375778	COL1A1,COL1A2,COL3A1,COL5A1,HSPG2,ITGA2,ITGAV,ITGB5,LAMA3,LAMA4,LAMB1,LAMB3,LAMC2,THBS1
HSA-1650814	Collagen biosynthesis and modifying enzymes	14	67	4.35e-09	ENSP00000196061,ENSP00000223061,ENSP00000223127,ENSP00000225964,ENSP00000236040,ENSP00000263556,ENSP00000282903,ENSP00000297268,ENSP00000304408,ENSP00000323696,ENSP00000325146,ENSP00000360882,ENSP00000384999,ENSP00000434412	COL12A1,COL1A1,COL1A2,COL3A1,COL5A1,CRTAP,LEPRE1,P4HA1,P4HA2,PCOLCE,PLOD1,PLOD2,PLOD3,SERPINH1
HSA-1430728	Metabolism	74	2032	7.24e-09	ENSP00000221957,ENSP00000222553,ENSP00000222572,ENSP00000229239,ENSP00000229416,ENSP00000233710,ENSP00000234590,ENSP00000240617,ENSP00000242592,ENSP00000243077,ENSP00000251527,ENSP00000256104,ENSP00000259938,ENSP00000261416,ENSP00000262134,ENSP00000262554,ENSP00000264167,ENSP00000265077,ENSP00000265333,ENSP00000265838,ENSP00000268097,ENSP00000268182,ENSP00000281243,ENSP00000285379,ENSP00000293362…	ACAA1,ACADL,ACADM,ACADS,ACADVL,ACAT1,ACOT9,ACSL3,ACSL5,ADH1B,AGPS,ALAD,ALDH9A1,BGN,CA2,CD36,CDA,CLPS,DPYD,ENO1,EPHX1,ESYT2,ETFB,FABP4,FHL2,FMOD,GAPDH,GCLC,GPD1,GPX2,GSTP1,HADH,HEXA,HEXB,HK1,HSP90AA1,HSP90AB1,HSPG2,IL4I1,IQGAP1,ITPR3,LDHA,LDHB,LPCAT2,LRP1,NADK2,NAMPT,NNMT,NT5C2,OMD,PARP4,PGK1,PLBD1,PLIN3,PON2,POR,PPP2R1A,PRELP,PRPS1,PSME3,PSMF1,QDPR,SARDH,SCP2,SEC23A,SLC16A3,SLC44A1,SPTLC1,TBXAS1,…
HSA-8874081	MET activates PTK2 signaling	10	29	3.57e-08	ENSP00000222399,ENSP00000225964,ENSP00000230538,ENSP00000264144,ENSP00000296585,ENSP00000297268,ENSP00000304408,ENSP00000324532,ENSP00000360882,ENSP00000375778	COL1A1,COL1A2,COL3A1,COL5A1,ITGA2,LAMA3,LAMA4,LAMB1,LAMB3,LAMC2
HSA-1474228	Degradation of the extracellular matrix	17	139	4.88e-08	ENSP00000218388,ENSP00000219070,ENSP00000222399,ENSP00000225964,ENSP00000236671,ENSP00000264144,ENSP00000295006,ENSP00000297268,ENSP00000304408,ENSP00000308208,ENSP00000324532,ENSP00000325146,ENSP00000345344,ENSP00000345672,ENSP00000360882,ENSP00000363827,ENSP00000375778	CAPN2,COL12A1,COL1A1,COL1A2,COL3A1,COL5A1,CTSB,CTSD,CTSL,HSPG2,LAMA3,LAMB1,LAMB3,LAMC2,MMP14,MMP2,TIMP1
HSA-2022090	Assembly of collagen fibrils and other multimeric structures	12	60	1.12e-07	ENSP00000223061,ENSP00000225964,ENSP00000264144,ENSP00000297268,ENSP00000304408,ENSP00000323856,ENSP00000324532,ENSP00000325146,ENSP00000345344,ENSP00000345672,ENSP00000360882,ENSP00000375778	COL12A1,COL1A1,COL1A2,COL3A1,COL5A1,CTSB,CTSL,LAMA3,LAMB3,LAMC2,PCOLCE,PLEC
HSA-5653656	Vesicle-mediated transport	35	649	1.2e-07	ENSP00000000233,ENSP00000221957,ENSP00000225964,ENSP00000227266,ENSP00000228825,ENSP00000231061,ENSP00000243077,ENSP00000248975,ENSP00000264389,ENSP00000294742,ENSP00000297268,ENSP00000304102,ENSP00000304408,ENSP00000306330,ENSP00000306881,ENSP00000312262,ENSP00000318687,ENSP00000320295,ENSP00000333547,ENSP00000333994,ENSP00000335153,ENSP00000351926,ENSP00000353224,ENSP00000357129,ENSP00000366565…	ACTR2,ADRBK1,AP2A1,AP2B1,ARF5,ARPC3,ARPC4,ARPC5,CD36,COL1A1,COL1A2,COL3A1,COPS4,COPS6,CTSC,ENSG00000258947,HBB,HSP90AA1,HSPH1,KIF13B,KLC1,LRP1,PICALM,PLIN3,RAB11B,RAB31,RAB5C,SEC23A,SPARC,SPTA1,TFRC,VPS28,YWHAG,YWHAH,YWHAZ
HSA-3000157	Laminin interactions	9	30	4.98e-07	ENSP00000216286,ENSP00000222399,ENSP00000230538,ENSP00000261023,ENSP00000264144,ENSP00000296585,ENSP00000324532,ENSP00000363827,ENSP00000375778	HSPG2,ITGA2,ITGAV,LAMA3,LAMA4,LAMB1,LAMB3,LAMC2,NID2
HSA-109582	Hemostasis	32	601	6.72e-07	ENSP00000218388,ENSP00000221992,ENSP00000225964,ENSP00000229795,ENSP00000231061,ENSP00000249842,ENSP00000260356,ENSP00000261023,ENSP00000262776,ENSP00000287097,ENSP00000293379,ENSP00000296511,ENSP00000296585,ENSP00000297268,ENSP00000320295,ENSP00000324804,ENSP00000333994,ENSP00000346032,ENSP00000356574,ENSP00000357076,ENSP00000357801,ENSP00000358866,ENSP00000360683,ENSP00000361883,ENSP00000363435…	ANXA2,ANXA5,CALU,CAP1,CD109,CD36,CEACAM5,CFL1,COL1A1,COL1A2,ENSG00000258947,FLNA,HBB,ISLR,ITGA2,ITGA5,ITGAV,ITPR3,KIF13B,KLC1,LGALS3BP,MAPK14,PPP2R1A,PTPN1,QSOX1,S100A10,SLC16A3,SPARC,TAGLN2,THBS1,TIMP1,YWHAZ
HSA-76002	Platelet activation, signaling and aggregation	20	256	1.25e-06	ENSP00000218388,ENSP00000225964,ENSP00000229795,ENSP00000231061,ENSP00000249842,ENSP00000260356,ENSP00000262776,ENSP00000287097,ENSP00000296511,ENSP00000297268,ENSP00000356574,ENSP00000357076,ENSP00000358866,ENSP00000360683,ENSP00000361883,ENSP00000363435,ENSP00000379287,ENSP00000399421,ENSP00000432660,ENSP00000438248	ANXA5,CALU,CAP1,CD109,CD36,CFL1,COL1A1,COL1A2,FLNA,ISLR,ITPR3,LGALS3BP,MAPK14,PTPN1,QSOX1,SPARC,TAGLN2,THBS1,TIMP1,YWHAZ
HSA-3299685	Detoxification of Reactive Oxygen Species	9	35	1.29e-06	ENSP00000301522,ENSP00000342026,ENSP00000363641,ENSP00000373477,ENSP00000374265,ENSP00000379042,ENSP00000381607,ENSP00000423822,ENSP00000430598	ATOX1,ERO1L,GPX2,GPX3,GPX8,GSTP1,PRDX2,PRDX6,TXN
HSA-3000170	Syndecan interactions	8	26	2.27e-06	ENSP00000225964,ENSP00000260356,ENSP00000261023,ENSP00000296181,ENSP00000296585,ENSP00000297268,ENSP00000304408,ENSP00000360882	COL1A1,COL1A2,COL3A1,COL5A1,ITGA2,ITGAV,ITGB5,THBS1
HSA-114608	Platelet degranulation	14	125	2.41e-06	ENSP00000218388,ENSP00000231061,ENSP00000249842,ENSP00000260356,ENSP00000262776,ENSP00000287097,ENSP00000296511,ENSP00000356574,ENSP00000357076,ENSP00000358866,ENSP00000361883,ENSP00000399421,ENSP00000432660,ENSP00000438248	ANXA5,CALU,CAP1,CD109,CD36,CFL1,FLNA,ISLR,LGALS3BP,QSOX1,SPARC,TAGLN2,THBS1,TIMP1
HSA-2173782	Binding and Uptake of Ligands by Scavenger Receptors	9	40	2.99e-06	ENSP00000225964,ENSP00000231061,ENSP00000243077,ENSP00000297268,ENSP00000304408,ENSP00000318687,ENSP00000333994,ENSP00000335153,ENSP00000399421	CD36,COL1A1,COL1A2,COL3A1,HBB,HSP90AA1,HSPH1,LRP1,SPARC
HSA-1566948	Elastic fibre formation	9	44	5.44e-06	ENSP00000261023,ENSP00000261978,ENSP00000293379,ENSP00000296181,ENSP00000309953,ENSP00000331544,ENSP00000378058,ENSP00000384169,ENSP00000386043	EFEMP1,EFEMP2,FBLN1,FBLN2,ITGA5,ITGAV,ITGB5,LTBP1,LTBP2
HSA-6806834	Signaling by MET	11	76	5.44e-06	ENSP00000222399,ENSP00000225964,ENSP00000230538,ENSP00000264144,ENSP00000296585,ENSP00000297268,ENSP00000304408,ENSP00000324532,ENSP00000360683,ENSP00000360882,ENSP00000375778	COL1A1,COL1A2,COL3A1,COL5A1,ITGA2,LAMA3,LAMA4,LAMB1,LAMB3,LAMC2,PTPN1
HSA-1442490	Collagen degradation	10	64	9.77e-06	ENSP00000219070,ENSP00000225964,ENSP00000236671,ENSP00000297268,ENSP00000304408,ENSP00000308208,ENSP00000325146,ENSP00000345344,ENSP00000345672,ENSP00000360882	COL12A1,COL1A1,COL1A2,COL3A1,COL5A1,CTSB,CTSD,CTSL,MMP14,MMP2
HSA-381426	Regulation of Insulin-like Growth Factor (IGF) transport and uptake by Insulin-like Growth Factor Binding Proteins (IGFBPs)	13	123	1.02e-05	ENSP00000215909,ENSP00000218388,ENSP00000219070,ENSP00000222399,ENSP00000265077,ENSP00000268150,ENSP00000295666,ENSP00000356574,ENSP00000370473,ENSP00000385923,ENSP00000386043,ENSP00000417185,ENSP00000438248	CALU,IGFBP3,IGFBP7,LAMB1,LGALS1,LTBP1,MFGE8,MMP2,NUCB1,QSOX1,TIMP1,VCAN,VWA1
HSA-216083	Integrin cell surface interactions	11	83	1.03e-05	ENSP00000222271,ENSP00000225964,ENSP00000260356,ENSP00000261023,ENSP00000293379,ENSP00000296181,ENSP00000296585,ENSP00000297268,ENSP00000304408,ENSP00000360882,ENSP00000363827	COL1A1,COL1A2,COL3A1,COL5A1,COMP,HSPG2,ITGA2,ITGA5,ITGAV,ITGB5,THBS1
HSA-8957275	Post-translational protein phosphorylation	12	106	1.37e-05	ENSP00000215909,ENSP00000218388,ENSP00000222399,ENSP00000265077,ENSP00000268150,ENSP00000295666,ENSP00000356574,ENSP00000370473,ENSP00000385923,ENSP00000386043,ENSP00000417185,ENSP00000438248	CALU,IGFBP3,IGFBP7,LAMB1,LGALS1,LTBP1,MFGE8,NUCB1,QSOX1,TIMP1,VCAN,VWA1
HSA-2129379	Molecules associated with elastic fibres	8	37	1.51e-05	ENSP00000261023,ENSP00000261978,ENSP00000296181,ENSP00000309953,ENSP00000331544,ENSP00000378058,ENSP00000384169,ENSP00000386043	EFEMP1,EFEMP2,FBLN1,FBLN2,ITGAV,ITGB5,LTBP1,LTBP2
HSA-9006934	Signaling by Receptor Tyrosine Kinases	24	437	1.51e-05	ENSP00000222005,ENSP00000222399,ENSP00000225964,ENSP00000229795,ENSP00000230538,ENSP00000253413,ENSP00000260356,ENSP00000261023,ENSP00000261799,ENSP00000264144,ENSP00000296585,ENSP00000297268,ENSP00000304408,ENSP00000324532,ENSP00000324804,ENSP00000335153,ENSP00000351926,ENSP00000354394,ENSP00000355751,ENSP00000360683,ENSP00000360882,ENSP00000363435,ENSP00000375778,ENSP00000482835	AP2A1,AP2B1,ATP6V1E1,CDC37,COL1A1,COL1A2,COL3A1,COL5A1,HSP90AA1,ITGA2,ITGAV,ITPR3,LAMA3,LAMA4,LAMB1,LAMB3,LAMC2,MAPK14,PDGFRB,PPP2R1A,PTPN1,STAT1,THBS1,THBS2
HSA-3560782	Diseases associated with glycosaminoglycan metabolism	8	40	2.37e-05	ENSP00000261416,ENSP00000265077,ENSP00000268097,ENSP00000327336,ENSP00000343924,ENSP00000347041,ENSP00000363827,ENSP00000364700	BGN,FMOD,HEXA,HEXB,HSPG2,OMD,PRELP,VCAN
HSA-1169410	Antiviral mechanism by IFN-stimulated genes	10	77	3.53e-05	ENSP00000228928,ENSP00000233057,ENSP00000261667,ENSP00000287156,ENSP00000342278,ENSP00000354394,ENSP00000358866,ENSP00000368699,ENSP00000381601,ENSP00000420213	EIF2AK2,FLNA,FLNB,ISG15,KPNA3,MX1,OAS2,OAS3,STAT1,UBE2L6
HSA-1280215	Cytokine Signaling in Immune system	29	654	5.81e-05	ENSP00000218388,ENSP00000219070,ENSP00000228928,ENSP00000229795,ENSP00000233057,ENSP00000261667,ENSP00000263097,ENSP00000287156,ENSP00000293362,ENSP00000297268,ENSP00000315768,ENSP00000324804,ENSP00000335153,ENSP00000338039,ENSP00000342278,ENSP00000346032,ENSP00000354394,ENSP00000358866,ENSP00000360683,ENSP00000360883,ENSP00000368699,ENSP00000378856,ENSP00000379287,ENSP00000381601,ENSP00000384273…	ANXA2,CD36,CFL1,CNN2,COL1A2,EIF2AK2,FLNA,FLNB,HSP90AA1,IFI30,IFIT3,ISG15,KPNA3,LGALS9,MAPK14,MMP2,MX1,OAS2,OAS3,PPP2R1A,PSME3,PSMF1,PTPN1,RELA,STAT1,STAT2,TIMP1,UBE2L6,YWHAZ
HSA-77286	mitochondrial fatty acid beta-oxidation of saturated fatty acids	5	11	9.45e-05	ENSP00000233710,ENSP00000242592,ENSP00000359871,ENSP00000438689,ENSP00000474560	ACADL,ACADM,ACADS,ACADVL,HADH
HSA-8856828	Clathrin-mediated endocytosis	12	137	0.00013	ENSP00000228825,ENSP00000264389,ENSP00000294742,ENSP00000304102,ENSP00000312262,ENSP00000351926,ENSP00000353224,ENSP00000367220,ENSP00000377015,ENSP00000388169,ENSP00000447053,ENSP00000482835	ACTR2,ADRBK1,AP2A1,AP2B1,ARPC3,ARPC4,ARPC5,COPS4,COPS6,PICALM,RAB5C,TFRC
HSA-913531	Interferon Signaling	14	189	0.00013	ENSP00000228928,ENSP00000233057,ENSP00000261667,ENSP00000287156,ENSP00000315768,ENSP00000342278,ENSP00000354394,ENSP00000358866,ENSP00000360683,ENSP00000360883,ENSP00000368699,ENSP00000381601,ENSP00000384886,ENSP00000420213	EIF2AK2,FLNA,FLNB,IFI30,IFIT3,ISG15,KPNA3,MX1,OAS2,OAS3,PTPN1,STAT1,STAT2,UBE2L6
HSA-2022857	Keratan sulfate degradation	5	13	0.00017	ENSP00000261416,ENSP00000268097,ENSP00000343924,ENSP00000347041,ENSP00000364700	FMOD,HEXA,HEXB,OMD,PRELP
HSA-1643685	Disease	37	1018	0.00018	ENSP00000222005,ENSP00000229416,ENSP00000233057,ENSP00000260356,ENSP00000261313,ENSP00000261416,ENSP00000261667,ENSP00000261799,ENSP00000265077,ENSP00000268097,ENSP00000268182,ENSP00000293362,ENSP00000295006,ENSP00000301522,ENSP00000324804,ENSP00000327336,ENSP00000335153,ENSP00000338039,ENSP00000343924,ENSP00000347041,ENSP00000351926,ENSP00000354394,ENSP00000355751,ENSP00000357283,ENSP00000360609…	AP2A1,AP2B1,BGN,CAPN2,CD36,CDC37,EIF2AK2,FMOD,GCLC,HEXA,HEXB,HK1,HSP90AA1,HSP90AB1,HSPG2,IQGAP1,ISG15,KPNA3,LMNA,LRRFIP1,MPRIP,OMD,PDGFRB,PEBP1,PPP2R1A,PRDX2,PRELP,PSME3,PSMF1,RELA,STAT1,TBXAS1,THBS1,THBS2,VCAN,VPS28,XPO1
HSA-2132295	MHC class II antigen presentation	11	119	0.00018	ENSP00000227266,ENSP00000236671,ENSP00000306881,ENSP00000320295,ENSP00000345344,ENSP00000345672,ENSP00000350911,ENSP00000351926,ENSP00000384886,ENSP00000414982,ENSP00000482835	AP2A1,AP2B1,CTSB,CTSC,CTSD,CTSE,CTSL,ENSG00000258947,IFI30,KLC1,SEC23A
HSA-8978868	Fatty acid metabolism	13	171	0.0002	ENSP00000222572,ENSP00000233710,ENSP00000242592,ENSP00000333664,ENSP00000348429,ENSP00000350012,ENSP00000359871,ENSP00000360569,ENSP00000368605,ENSP00000374265,ENSP00000389414,ENSP00000438689,ENSP00000474560	ACAA1,ACADL,ACADM,ACADS,ACADVL,ACOT9,ACSL3,ACSL5,GPX2,HADH,PON2,SCP2,TBXAS1
HSA-2214320	Anchoring fibril formation	5	15	0.00026	ENSP00000225964,ENSP00000264144,ENSP00000297268,ENSP00000324532,ENSP00000375778	COL1A1,COL1A2,LAMA3,LAMB3,LAMC2
HSA-199991	Membrane Trafficking	26	612	0.00032	ENSP00000000233,ENSP00000221957,ENSP00000227266,ENSP00000228825,ENSP00000248975,ENSP00000264389,ENSP00000294742,ENSP00000304102,ENSP00000306330,ENSP00000306881,ENSP00000312262,ENSP00000320295,ENSP00000333547,ENSP00000351926,ENSP00000353224,ENSP00000357129,ENSP00000366565,ENSP00000367220,ENSP00000377015,ENSP00000379287,ENSP00000388169,ENSP00000414982,ENSP00000427900,ENSP00000447053,ENSP00000461945…	ACTR2,ADRBK1,AP2A1,AP2B1,ARF5,ARPC3,ARPC4,ARPC5,COPS4,COPS6,CTSC,ENSG00000258947,KIF13B,KLC1,PICALM,PLIN3,RAB11B,RAB31,RAB5C,SEC23A,SPTA1,TFRC,VPS28,YWHAG,YWHAH,YWHAZ
HSA-422475	Axon guidance	24	541	0.00034	ENSP00000219070,ENSP00000222399,ENSP00000228825,ENSP00000229795,ENSP00000261023,ENSP00000293362,ENSP00000293379,ENSP00000294742,ENSP00000296585,ENSP00000304408,ENSP00000320295,ENSP00000335153,ENSP00000338039,ENSP00000343690,ENSP00000351926,ENSP00000356042,ENSP00000357129,ENSP00000360609,ENSP00000360882,ENSP00000361883,ENSP00000367220,ENSP00000388169,ENSP00000432660,ENSP00000482835	ACTR2,AP2A1,AP2B1,ARPC3,ARPC4,ARPC5,CAP1,CFL1,COL3A1,COL5A1,DPYSL3,ENSG00000258947,EZR,HSP90AA1,HSP90AB1,ITGA2,ITGA5,ITGAV,LAMB1,MAPK14,MMP2,PSME3,PSMF1,SPTA1
HSA-2262752	Cellular responses to stress	19	384	0.00062	ENSP00000229795,ENSP00000254322,ENSP00000293362,ENSP00000295666,ENSP00000301522,ENSP00000318687,ENSP00000320295,ENSP00000335153,ENSP00000338039,ENSP00000342026,ENSP00000360609,ENSP00000363641,ENSP00000373477,ENSP00000374265,ENSP00000379042,ENSP00000381607,ENSP00000384273,ENSP00000423822,ENSP00000430598	ATOX1,DNAJB1,ENSG00000258947,ERO1L,GPX2,GPX3,GPX8,GSTP1,HSP90AA1,HSP90AB1,HSPH1,IGFBP7,MAPK14,PRDX2,PRDX6,PSME3,PSMF1,RELA,TXN
HSA-556833	Metabolism of lipids	28	721	0.00066	ENSP00000221957,ENSP00000222572,ENSP00000233710,ENSP00000240617,ENSP00000242592,ENSP00000251527,ENSP00000256104,ENSP00000261416,ENSP00000262134,ENSP00000262554,ENSP00000264167,ENSP00000265838,ENSP00000268097,ENSP00000301149,ENSP00000306881,ENSP00000333664,ENSP00000348429,ENSP00000350012,ENSP00000359871,ENSP00000360569,ENSP00000363852,ENSP00000368605,ENSP00000374265,ENSP00000386665,ENSP00000389414…	ACAA1,ACADL,ACADM,ACADS,ACADVL,ACAT1,ACOT9,ACSL3,ACSL5,AGPS,CD36,ESYT2,FABP4,FHL2,GPD1,GPX2,HADH,HEXA,HEXB,LPCAT2,PLBD1,PLIN3,PON2,SCP2,SEC23A,SLC44A1,SPTLC1,TBXAS1
HSA-1280218	Adaptive Immune System	28	733	0.00085	ENSP00000225964,ENSP00000227266,ENSP00000236671,ENSP00000261023,ENSP00000287156,ENSP00000293362,ENSP00000296181,ENSP00000297268,ENSP00000304408,ENSP00000306881,ENSP00000307513,ENSP00000320295,ENSP00000324804,ENSP00000338039,ENSP00000345344,ENSP00000345672,ENSP00000346206,ENSP00000350911,ENSP00000351926,ENSP00000363435,ENSP00000378323,ENSP00000379287,ENSP00000384273,ENSP00000384886,ENSP00000399421…	AP2A1,AP2B1,CD36,COL1A1,COL1A2,COL3A1,CTSB,CTSC,CTSD,CTSE,CTSL,ENSG00000258947,IFI30,ITGAV,ITGB5,ITPR3,KLC1,LMO7,MRC2,PPP2R1A,PPP3CA,PSME3,PSMF1,RELA,SEC23A,TAP1,UBE2L6,YWHAZ
HSA-77289	Mitochondrial Fatty Acid Beta-Oxidation	6	37	0.0011	ENSP00000233710,ENSP00000242592,ENSP00000359871,ENSP00000368605,ENSP00000438689,ENSP00000474560	ACADL,ACADM,ACADS,ACADVL,ACOT9,HADH
HSA-430116	GP1b-IX-V activation signalling	4	11	0.0013	ENSP00000225964,ENSP00000297268,ENSP00000358866,ENSP00000379287	COL1A1,COL1A2,FLNA,YWHAZ
HSA-446107	Type I hemidesmosome assembly	4	11	0.0013	ENSP00000264144,ENSP00000323856,ENSP00000324532,ENSP00000375778	LAMA3,LAMB3,LAMC2,PLEC
HSA-2029482	Regulation of actin dynamics for phagocytic cup formation	7	60	0.0016	ENSP00000228825,ENSP00000294742,ENSP00000335153,ENSP00000360609,ENSP00000367220,ENSP00000388169,ENSP00000432660	ACTR2,ARPC3,ARPC4,ARPC5,CFL1,HSP90AA1,HSP90AB1
HSA-2029480	Fcgamma receptor (FCGR) dependent phagocytosis	8	84	0.0018	ENSP00000228825,ENSP00000294742,ENSP00000335153,ENSP00000360609,ENSP00000363435,ENSP00000367220,ENSP00000388169,ENSP00000432660	ACTR2,ARPC3,ARPC4,ARPC5,CFL1,HSP90AA1,HSP90AB1,ITPR3
HSA-5628897	TP53 Regulates Metabolic Genes	8	83	0.0018	ENSP00000179259,ENSP00000248975,ENSP00000301522,ENSP00000306330,ENSP00000362092,ENSP00000363641,ENSP00000374265,ENSP00000379287	C12orf5,GPX2,PRDX2,RRAGC,TXN,YWHAG,YWHAH,YWHAZ
HSA-8953897	Cellular responses to external stimuli	20	459	0.0018	ENSP00000229795,ENSP00000254322,ENSP00000293362,ENSP00000295666,ENSP00000301522,ENSP00000318687,ENSP00000320295,ENSP00000335153,ENSP00000338039,ENSP00000342026,ENSP00000360609,ENSP00000362092,ENSP00000363641,ENSP00000373477,ENSP00000374265,ENSP00000379042,ENSP00000381607,ENSP00000384273,ENSP00000423822,ENSP00000430598	ATOX1,DNAJB1,ENSG00000258947,ERO1L,GPX2,GPX3,GPX8,GSTP1,HSP90AA1,HSP90AB1,HSPH1,IGFBP7,MAPK14,PRDX2,PRDX6,PSME3,PSMF1,RELA,RRAGC,TXN
HSA-3781865	Diseases of glycosylation	10	136	0.002	ENSP00000260356,ENSP00000261416,ENSP00000265077,ENSP00000268097,ENSP00000327336,ENSP00000343924,ENSP00000347041,ENSP00000355751,ENSP00000363827,ENSP00000364700	BGN,FMOD,HEXA,HEXB,HSPG2,OMD,PRELP,THBS1,THBS2,VCAN
HSA-2024101	CS/DS degradation	4	14	0.0025	ENSP00000261416,ENSP00000265077,ENSP00000268097,ENSP00000327336	BGN,HEXA,HEXB,VCAN
HSA-909733	Interferon alpha/beta signaling	7	66	0.0025	ENSP00000228928,ENSP00000315768,ENSP00000342278,ENSP00000360683,ENSP00000360883,ENSP00000368699,ENSP00000381601	IFIT3,ISG15,MX1,OAS2,OAS3,PTPN1,STAT2
HSA-2682334	EPH-Ephrin signaling	8	91	0.0028	ENSP00000219070,ENSP00000228825,ENSP00000294742,ENSP00000351926,ENSP00000367220,ENSP00000388169,ENSP00000432660,ENSP00000482835	ACTR2,AP2A1,AP2B1,ARPC3,ARPC4,ARPC5,CFL1,MMP2
HSA-373760	L1CAM interactions	9	116	0.0028	ENSP00000222399,ENSP00000261023,ENSP00000293379,ENSP00000296585,ENSP00000320295,ENSP00000351926,ENSP00000356042,ENSP00000357129,ENSP00000482835	AP2A1,AP2B1,ENSG00000258947,EZR,ITGA2,ITGA5,ITGAV,LAMB1,SPTA1
HSA-71387	Metabolism of carbohydrates	14	266	0.0028	ENSP00000229239,ENSP00000234590,ENSP00000261416,ENSP00000265077,ENSP00000268097,ENSP00000324804,ENSP00000327336,ENSP00000343924,ENSP00000347041,ENSP00000361512,ENSP00000362413,ENSP00000363827,ENSP00000364700,ENSP00000402103	BGN,ENO1,FMOD,GAPDH,HEXA,HEXB,HK1,HSPG2,OMD,PGK1,PPP2R1A,PRELP,PRPS1,VCAN
HSA-844456	The NLRP3 inflammasome	4	15	0.0028	ENSP00000247470,ENSP00000360609,ENSP00000363641,ENSP00000384273	HSP90AB1,PYCARD,RELA,TXN
HSA-1169408	ISG15 antiviral mechanism	7	69	0.003	ENSP00000233057,ENSP00000261667,ENSP00000287156,ENSP00000354394,ENSP00000368699,ENSP00000381601,ENSP00000420213	EIF2AK2,FLNB,ISG15,KPNA3,MX1,STAT1,UBE2L6
HSA-195258	RHO GTPase Effectors	14	273	0.0033	ENSP00000228825,ENSP00000248975,ENSP00000268182,ENSP00000294742,ENSP00000306330,ENSP00000320295,ENSP00000324804,ENSP00000358866,ENSP00000367220,ENSP00000379287,ENSP00000384863,ENSP00000388169,ENSP00000414982,ENSP00000432660	ACTR2,ARPC3,ARPC4,ARPC5,CFL1,ENSG00000258947,FLNA,IQGAP1,KLC1,PPP2R1A,XPO1,YWHAG,YWHAH,YWHAZ
HSA-1236975	Antigen processing-Cross presentation	8	96	0.0036	ENSP00000261023,ENSP00000293362,ENSP00000296181,ENSP00000307513,ENSP00000338039,ENSP00000345344,ENSP00000346206,ENSP00000399421	CD36,CTSL,ITGAV,ITGB5,MRC2,PSME3,PSMF1,TAP1
HSA-186797	Signaling by PDGF	6	55	0.0055	ENSP00000260356,ENSP00000261799,ENSP00000304408,ENSP00000354394,ENSP00000355751,ENSP00000360882	COL3A1,COL5A1,PDGFRB,STAT1,THBS1,THBS2
HSA-3656243	Defective ST3GAL3 causes MCT12 and EIEE15	3	7	0.0056	ENSP00000343924,ENSP00000347041,ENSP00000364700	FMOD,OMD,PRELP
HSA-9033500	TYSND1 cleaves peroxisomal proteins	3	7	0.0056	ENSP00000264167,ENSP00000333664,ENSP00000360569	ACAA1,AGPS,SCP2
HSA-1236973	Cross-presentation of particulate exogenous antigens (phagosomes)	3	8	0.0072	ENSP00000261023,ENSP00000296181,ENSP00000399421	CD36,ITGAV,ITGB5
HSA-3656225	Defective CHST6 causes MCDC1	3	8	0.0072	ENSP00000343924,ENSP00000347041,ENSP00000364700	FMOD,OMD,PRELP
HSA-3656244	Defective B4GALT1 causes B4GALT1-CDG (CDG-2d)	3	8	0.0072	ENSP00000343924,ENSP00000347041,ENSP00000364700	FMOD,OMD,PRELP
HSA-8983711	OAS antiviral response	3	9	0.0091	ENSP00000228928,ENSP00000342278,ENSP00000358866	FLNA,OAS2,OAS3
HSA-3928662	EPHB-mediated forward signaling	5	41	0.0093	ENSP00000228825,ENSP00000294742,ENSP00000367220,ENSP00000388169,ENSP00000432660	ACTR2,ARPC3,ARPC4,ARPC5,CFL1
HSA-446728	Cell junction organization	7	91	0.0115	ENSP00000264144,ENSP00000323856,ENSP00000324532,ENSP00000336762,ENSP00000358866,ENSP00000375778,ENSP00000416387	ANG,FBLIM1,FLNA,LAMA3,LAMB3,LAMC2,PLEC
HSA-8948216	Collagen chain trimerization	5	44	0.0121	ENSP00000225964,ENSP00000297268,ENSP00000304408,ENSP00000325146,ENSP00000360882	COL12A1,COL1A1,COL1A2,COL3A1,COL5A1
HSA-1630316	Glycosaminoglycan metabolism	8	122	0.0132	ENSP00000261416,ENSP00000265077,ENSP00000268097,ENSP00000327336,ENSP00000343924,ENSP00000347041,ENSP00000363827,ENSP00000364700	BGN,FMOD,HEXA,HEXB,HSPG2,OMD,PRELP,VCAN
HSA-449147	Signaling by Interleukins	17	439	0.0134	ENSP00000218388,ENSP00000219070,ENSP00000229795,ENSP00000263097,ENSP00000293362,ENSP00000297268,ENSP00000315768,ENSP00000324804,ENSP00000335153,ENSP00000338039,ENSP00000346032,ENSP00000354394,ENSP00000378856,ENSP00000379287,ENSP00000384273,ENSP00000399421,ENSP00000432660	ANXA2,CD36,CFL1,CNN2,COL1A2,HSP90AA1,LGALS9,MAPK14,MMP2,PPP2R1A,PSME3,PSMF1,RELA,STAT1,STAT2,TIMP1,YWHAZ
HSA-1500931	Cell-Cell communication	8	127	0.0163	ENSP00000264144,ENSP00000268182,ENSP00000323856,ENSP00000324532,ENSP00000336762,ENSP00000358866,ENSP00000375778,ENSP00000416387	ANG,FBLIM1,FLNA,IQGAP1,LAMA3,LAMB3,LAMC2,PLEC
HSA-8856825	Cargo recognition for clathrin-mediated endocytosis	7	98	0.0163	ENSP00000264389,ENSP00000304102,ENSP00000312262,ENSP00000351926,ENSP00000353224,ENSP00000377015,ENSP00000482835	ADRBK1,AP2A1,AP2B1,COPS4,COPS6,PICALM,TFRC
HSA-1793185	Chondroitin sulfate/dermatan sulfate metabolism	5	49	0.0176	ENSP00000261416,ENSP00000265077,ENSP00000268097,ENSP00000327336,ENSP00000363827	BGN,HEXA,HEXB,HSPG2,VCAN
HSA-3371568	Attenuation phase	3	13	0.0196	ENSP00000254322,ENSP00000335153,ENSP00000360609	DNAJB1,HSP90AA1,HSP90AB1
HSA-75035	Chk1/Chk2(Cds1) mediated inactivation of Cyclin B:Cdk1 complex	3	13	0.0196	ENSP00000248975,ENSP00000306330,ENSP00000379287	YWHAG,YWHAH,YWHAZ
HSA-70268	Pyruvate metabolism	4	30	0.0203	ENSP00000265333,ENSP00000379386,ENSP00000445175,ENSP00000463978	LDHA,LDHB,SLC16A3,VDAC1
HSA-196807	Nicotinate metabolism	4	31	0.0224	ENSP00000222553,ENSP00000371362,ENSP00000371419,ENSP00000441434	NADK2,NAMPT,NNMT,PARP4
HSA-168643	Nucleotide-binding domain, leucine rich repeat containing receptor (NLR) signaling pathways	5	54	0.0246	ENSP00000229795,ENSP00000247470,ENSP00000360609,ENSP00000363641,ENSP00000384273	HSP90AB1,MAPK14,PYCARD,RELA,TXN
HSA-111447	Activation of BAD and translocation to mitochondria	3	15	0.0263	ENSP00000248975,ENSP00000306330,ENSP00000379287	YWHAG,YWHAH,YWHAZ
HSA-75892	Platelet Adhesion to exposed collagen	3	15	0.0263	ENSP00000225964,ENSP00000296585,ENSP00000297268	COL1A1,COL1A2,ITGA2
HSA-399954	Sema3A PAK dependent Axon repulsion	3	16	0.0302	ENSP00000335153,ENSP00000360609,ENSP00000432660	CFL1,HSP90AA1,HSP90AB1
HSA-194315	Signaling by Rho GTPases	15	402	0.0307	ENSP00000228825,ENSP00000248975,ENSP00000268182,ENSP00000294742,ENSP00000306330,ENSP00000310491,ENSP00000320295,ENSP00000324804,ENSP00000358866,ENSP00000367220,ENSP00000379287,ENSP00000384863,ENSP00000388169,ENSP00000414982,ENSP00000432660	ACTR2,ARHGAP1,ARPC3,ARPC4,ARPC5,CFL1,ENSG00000258947,FLNA,IQGAP1,KLC1,PPP2R1A,XPO1,YWHAG,YWHAH,YWHAZ
HSA-5663213	RHO GTPases Activate WASPs and WAVEs	4	35	0.0312	ENSP00000228825,ENSP00000294742,ENSP00000367220,ENSP00000388169	ACTR2,ARPC3,ARPC4,ARPC5
HSA-1266738	Developmental Biology	29	1023	0.0325	ENSP00000219070,ENSP00000222399,ENSP00000228825,ENSP00000229795,ENSP00000256104,ENSP00000261023,ENSP00000293362,ENSP00000293379,ENSP00000294742,ENSP00000296585,ENSP00000304408,ENSP00000308452,ENSP00000320295,ENSP00000335153,ENSP00000338039,ENSP00000343690,ENSP00000351926,ENSP00000355124,ENSP00000356042,ENSP00000357129,ENSP00000360609,ENSP00000360882,ENSP00000361883,ENSP00000367220,ENSP00000384273…	ACTR2,AP2A1,AP2B1,ARPC3,ARPC4,ARPC5,CAP1,CD36,CFL1,COL3A1,COL5A1,DPYSL3,ENSG00000258947,EZR,FABP4,HSP90AA1,HSP90AB1,ITGA2,ITGA5,ITGAV,KRT17,KRT19,LAMB1,MAPK14,MMP2,PSME3,PSMF1,RELA,SPTA1
HSA-195721	Signaling by WNT	12	293	0.0366	ENSP00000274063,ENSP00000293362,ENSP00000299138,ENSP00000324804,ENSP00000338039,ENSP00000349486,ENSP00000351926,ENSP00000363435,ENSP00000378323,ENSP00000379287,ENSP00000384863,ENSP00000482835	AP2A1,AP2B1,ITPR3,PPP2R1A,PPP3CA,PSME3,PSMF1,SCRIB,SFRP2,VPS35,XPO1,YWHAZ
HSA-2243919	Crosslinking of collagen fibrils	3	18	0.0383	ENSP00000223061,ENSP00000225964,ENSP00000297268	COL1A1,COL1A2,PCOLCE
HSA-3000480	Scavenging by Class A Receptors	3	18	0.0383	ENSP00000225964,ENSP00000297268,ENSP00000304408	COL1A1,COL1A2,COL3A1
HSA-197264	Nicotinamide salvaging	3	19	0.0429	ENSP00000222553,ENSP00000371419,ENSP00000441434	NAMPT,NNMT,PARP4
HSA-77310	Beta oxidation of lauroyl-CoA to decanoyl-CoA-CoA	2	5	0.0429	ENSP00000233710,ENSP00000474560	ACADL,HADH
HSA-77348	Beta oxidation of octanoyl-CoA to hexanoyl-CoA	2	5	0.0429	ENSP00000359871,ENSP00000474560	ACADM,HADH
HSA-77350	Beta oxidation of hexanoyl-CoA to butanoyl-CoA	2	5	0.0429	ENSP00000242592,ENSP00000474560	ACADS,HADH
HSA-77352	Beta oxidation of butanoyl-CoA to acetyl-CoA	2	5	0.0429	ENSP00000242592,ENSP00000474560	ACADS,HADH
HSA-8964038	LDL clearance	3	19	0.0429	ENSP00000351926,ENSP00000442464,ENSP00000482835	AP2A1,AP2B1,NCEH1
HSA-5607764	CLEC7A (Dectin-1) signaling	6	94	0.0449	ENSP00000247470,ENSP00000293362,ENSP00000338039,ENSP00000363435,ENSP00000378323,ENSP00000384273	ITPR3,PPP3CA,PSME3,PSMF1,PYCARD,RELA
HSA-3560783	Defective B4GALT7 causes EDS, progeroid type	3	20	0.0454	ENSP00000265077,ENSP00000327336,ENSP00000363827	BGN,HSPG2,VCAN
HSA-3560801	Defective B3GAT3 causes JDSSDHD	3	20	0.0454	ENSP00000265077,ENSP00000327336,ENSP00000363827	BGN,HSPG2,VCAN
HSA-4420332	Defective B3GALT6 causes EDSP2 and SEMDJL1	3	20	0.0454	ENSP00000265077,ENSP00000327336,ENSP00000363827	BGN,HSPG2,VCAN
HSA-70171	Glycolysis	5	66	0.0454	ENSP00000229239,ENSP00000234590,ENSP00000324804,ENSP00000362413,ENSP00000402103	ENO1,GAPDH,HK1,PGK1,PPP2R1A
KEGG Pathway
#term ID	term description	observed gene count	background gene count	false discovery rate	matching proteins in your network (IDs)	matching proteins in your network (labels)
hsa04512	ECM-receptor interaction	16	81	9.15e-10	ENSP00000222271,ENSP00000222399,ENSP00000225964,ENSP00000230538,ENSP00000260356,ENSP00000261023,ENSP00000264144,ENSP00000293379,ENSP00000296181,ENSP00000296585,ENSP00000297268,ENSP00000324532,ENSP00000355751,ENSP00000363827,ENSP00000375778,ENSP00000399421	CD36,COL1A1,COL1A2,COMP,HSPG2,ITGA2,ITGA5,ITGAV,ITGB5,LAMA3,LAMA4,LAMB1,LAMB3,LAMC2,THBS1,THBS2
hsa00071	Fatty acid degradation	11	44	1.31e-07	ENSP00000233710,ENSP00000242592,ENSP00000265838,ENSP00000306606,ENSP00000333664,ENSP00000346827,ENSP00000348429,ENSP00000350012,ENSP00000359871,ENSP00000438689,ENSP00000474560	ACAA1,ACADL,ACADM,ACADS,ACADVL,ACAT1,ACSL3,ACSL5,ADH1B,ALDH9A1,HADH
hsa05165	Human papillomavirus infection	24	317	1.54e-07	ENSP00000222271,ENSP00000222399,ENSP00000225964,ENSP00000230538,ENSP00000233057,ENSP00000260356,ENSP00000261023,ENSP00000261799,ENSP00000264144,ENSP00000293379,ENSP00000296181,ENSP00000296585,ENSP00000297268,ENSP00000315768,ENSP00000320171,ENSP00000324532,ENSP00000324804,ENSP00000349486,ENSP00000354394,ENSP00000355751,ENSP00000368699,ENSP00000375778,ENSP00000381601,ENSP00000384273	COL1A1,COL1A2,COMP,EIF2AK2,ISG15,ITGA2,ITGA5,ITGAV,ITGB5,LAMA3,LAMA4,LAMB1,LAMB3,LAMC2,MX1,PDGFRB,PKM,PPP2R1A,RELA,SCRIB,STAT1,STAT2,THBS1,THBS2
hsa04621	NOD-like receptor signaling pathway	17	166	4.85e-07	ENSP00000222553,ENSP00000228928,ENSP00000229795,ENSP00000247470,ENSP00000265333,ENSP00000301945,ENSP00000315768,ENSP00000335153,ENSP00000342278,ENSP00000345672,ENSP00000354394,ENSP00000360609,ENSP00000362144,ENSP00000363435,ENSP00000363641,ENSP00000384273,ENSP00000449089	ANTXR1,CTSB,DNM1L,HSP90AA1,HSP90AB1,ITPR3,MAPK14,MCU,NAMPT,OAS2,OAS3,PYCARD,RELA,STAT1,STAT2,TXN,VDAC1
hsa04510	Focal adhesion	18	197	7.25e-07	ENSP00000222271,ENSP00000222399,ENSP00000225964,ENSP00000230538,ENSP00000260356,ENSP00000261023,ENSP00000261799,ENSP00000264144,ENSP00000293379,ENSP00000295006,ENSP00000296181,ENSP00000296585,ENSP00000297268,ENSP00000324532,ENSP00000355751,ENSP00000358866,ENSP00000375778,ENSP00000420213	CAPN2,COL1A1,COL1A2,COMP,FLNA,FLNB,ITGA2,ITGA5,ITGAV,ITGB5,LAMA3,LAMA4,LAMB1,LAMB3,LAMC2,PDGFRB,THBS1,THBS2
hsa04151	PI3K-Akt signaling pathway	23	348	1.81e-06	ENSP00000222005,ENSP00000222271,ENSP00000222399,ENSP00000225964,ENSP00000230538,ENSP00000248975,ENSP00000260356,ENSP00000261023,ENSP00000261799,ENSP00000264144,ENSP00000293379,ENSP00000296181,ENSP00000296585,ENSP00000297268,ENSP00000306330,ENSP00000324532,ENSP00000324804,ENSP00000335153,ENSP00000355751,ENSP00000360609,ENSP00000375778,ENSP00000379287,ENSP00000384273	CDC37,COL1A1,COL1A2,COMP,HSP90AA1,HSP90AB1,ITGA2,ITGA5,ITGAV,ITGB5,LAMA3,LAMA4,LAMB1,LAMB3,LAMC2,PDGFRB,PPP2R1A,RELA,THBS1,THBS2,YWHAG,YWHAH,YWHAZ
hsa04145	Phagosome	15	145	1.88e-06	ENSP00000222271,ENSP00000253413,ENSP00000260356,ENSP00000261023,ENSP00000293379,ENSP00000296181,ENSP00000296585,ENSP00000307513,ENSP00000320295,ENSP00000345344,ENSP00000346206,ENSP00000353224,ENSP00000355751,ENSP00000399421,ENSP00000447053	ATP6V1E1,CD36,COMP,CTSL,ENSG00000258947,ITGA2,ITGA5,ITGAV,ITGB5,MRC2,RAB5C,TAP1,TFRC,THBS1,THBS2
hsa01212	Fatty acid metabolism	9	48	9.52e-06	ENSP00000233710,ENSP00000242592,ENSP00000265838,ENSP00000333664,ENSP00000348429,ENSP00000350012,ENSP00000359871,ENSP00000438689,ENSP00000474560	ACAA1,ACADL,ACADM,ACADS,ACADVL,ACAT1,ACSL3,ACSL5,HADH
hsa01100	Metabolic pathways	45	1250	2.83e-05	ENSP00000222553,ENSP00000229239,ENSP00000229416,ENSP00000233710,ENSP00000234590,ENSP00000242592,ENSP00000253413,ENSP00000261416,ENSP00000262134,ENSP00000262554,ENSP00000263556,ENSP00000264167,ENSP00000265838,ENSP00000268097,ENSP00000281243,ENSP00000306606,ENSP00000320171,ENSP00000324532,ENSP00000333664,ENSP00000339479,ENSP00000342026,ENSP00000343838,ENSP00000346827,ENSP00000348429,ENSP00000350012…	ACAA1,ACADL,ACADM,ACADS,ACADVL,ACAT1,ACSL3,ACSL5,ADH1B,AGPS,ALAD,ALDH9A1,ATP6V1E1,CDA,DPYD,ENO1,GAPDH,GCLC,HADH,HEXA,HEXB,HK1,IL4I1,LAMA3,LDHA,LDHB,LPCAT2,NADK2,NAMPT,NNMT,NT5C2,P4HA1,P4HA2,PGK1,PKM,PNLIPRP1,PRDX6,PRPS1,QDPR,SARDH,SCP2,SPTLC1,TBXAS1,TYMP,UGT1A10
hsa00010	Glycolysis / Gluconeogenesis	9	68	0.0001	ENSP00000229239,ENSP00000234590,ENSP00000306606,ENSP00000320171,ENSP00000346827,ENSP00000362413,ENSP00000379386,ENSP00000402103,ENSP00000445175	ADH1B,ALDH9A1,ENO1,GAPDH,HK1,LDHA,LDHB,PGK1,PKM
hsa05146	Amoebiasis	10	94	0.00016	ENSP00000222399,ENSP00000225964,ENSP00000230538,ENSP00000264144,ENSP00000297268,ENSP00000304408,ENSP00000324532,ENSP00000375778,ENSP00000384273,ENSP00000447053	COL1A1,COL1A2,COL3A1,LAMA3,LAMA4,LAMB1,LAMB3,LAMC2,RAB5C,RELA
hsa05205	Proteoglycans in cancer	14	195	0.00017	ENSP00000219070,ENSP00000229795,ENSP00000260356,ENSP00000261023,ENSP00000268182,ENSP00000293379,ENSP00000296181,ENSP00000296585,ENSP00000345344,ENSP00000356042,ENSP00000358866,ENSP00000363435,ENSP00000363827,ENSP00000420213	CTSL,EZR,FLNA,FLNB,HSPG2,IQGAP1,ITGA2,ITGA5,ITGAV,ITGB5,ITPR3,MAPK14,MMP2,THBS1
hsa05132	Salmonella infection	9	84	0.00038	ENSP00000228825,ENSP00000229795,ENSP00000247470,ENSP00000294742,ENSP00000358866,ENSP00000384273,ENSP00000388169,ENSP00000414982,ENSP00000420213	ARPC3,ARPC4,ARPC5,FLNA,FLNB,KLC1,MAPK14,PYCARD,RELA
hsa00280	Valine, leucine and isoleucine degradation	7	48	0.0005	ENSP00000242592,ENSP00000265838,ENSP00000333664,ENSP00000346827,ENSP00000359871,ENSP00000472474,ENSP00000474560	ACAA1,ACADM,ACADS,ACAT1,ALDH9A1,HADH,IL4I1
hsa05164	Influenza A	12	168	0.00063	ENSP00000228928,ENSP00000229795,ENSP00000233057,ENSP00000247470,ENSP00000254322,ENSP00000265333,ENSP00000315768,ENSP00000342278,ENSP00000354394,ENSP00000381601,ENSP00000384273,ENSP00000384863	DNAJB1,EIF2AK2,MAPK14,MX1,OAS2,OAS3,PYCARD,RELA,STAT1,STAT2,VDAC1,XPO1
hsa03320	PPAR signaling pathway	8	72	0.0007	ENSP00000233710,ENSP00000256104,ENSP00000333664,ENSP00000348429,ENSP00000350012,ENSP00000359871,ENSP00000360569,ENSP00000399421	ACAA1,ACADL,ACADM,ACSL3,ACSL5,CD36,FABP4,SCP2
hsa00620	Pyruvate metabolism	6	39	0.0011	ENSP00000265838,ENSP00000320171,ENSP00000346827,ENSP00000379386,ENSP00000380514,ENSP00000445175	ACAT1,ALDH9A1,HAGH,LDHA,LDHB,PKM
hsa04144	Endocytosis	14	242	0.0011	ENSP00000000233,ENSP00000228825,ENSP00000294742,ENSP00000299138,ENSP00000312262,ENSP00000331342,ENSP00000333547,ENSP00000351926,ENSP00000353224,ENSP00000366565,ENSP00000388169,ENSP00000447053,ENSP00000461945,ENSP00000482835	ADRBK1,AP2A1,AP2B1,ARF5,ARPC3,ARPC4,ARPC5,RAB11B,RAB11FIP1,RAB31,RAB5C,TFRC,VPS28,VPS35
hsa04217	Necroptosis	11	155	0.0011	ENSP00000233057,ENSP00000247470,ENSP00000265333,ENSP00000295006,ENSP00000303754,ENSP00000315768,ENSP00000335153,ENSP00000354394,ENSP00000360609,ENSP00000371419,ENSP00000449089	CAPN2,DNM1L,EIF2AK2,HSP90AA1,HSP90AB1,PARP4,PPID,PYCARD,STAT1,STAT2,VDAC1
hsa04210	Apoptosis	10	135	0.0016	ENSP00000227266,ENSP00000236671,ENSP00000295006,ENSP00000345344,ENSP00000345672,ENSP00000357129,ENSP00000357283,ENSP00000363435,ENSP00000371419,ENSP00000384273	CAPN2,CTSB,CTSC,CTSD,CTSL,ITPR3,LMNA,PARP4,RELA,SPTA1
hsa04612	Antigen processing and presentation	7	66	0.0021	ENSP00000293362,ENSP00000335153,ENSP00000345344,ENSP00000345672,ENSP00000346206,ENSP00000360609,ENSP00000384886	CTSB,CTSL,HSP90AA1,HSP90AB1,IFI30,PSME3,TAP1
hsa01200	Carbon metabolism	9	116	0.0022	ENSP00000229239,ENSP00000234590,ENSP00000242592,ENSP00000265838,ENSP00000320171,ENSP00000359871,ENSP00000361512,ENSP00000362413,ENSP00000402103	ACADM,ACADS,ACAT1,ENO1,GAPDH,HK1,PGK1,PKM,PRPS1
hsa05144	Malaria	6	47	0.0022	ENSP00000222271,ENSP00000243077,ENSP00000260356,ENSP00000333994,ENSP00000355751,ENSP00000399421	CD36,COMP,HBB,LRP1,THBS1,THBS2
hsa05222	Small cell lung cancer	8	92	0.0023	ENSP00000222399,ENSP00000230538,ENSP00000261023,ENSP00000264144,ENSP00000296585,ENSP00000324532,ENSP00000375778,ENSP00000384273	ITGA2,ITGAV,LAMA3,LAMA4,LAMB1,LAMB3,LAMC2,RELA
hsa04066	HIF-1 signaling pathway	8	98	0.0032	ENSP00000218388,ENSP00000229239,ENSP00000234590,ENSP00000353224,ENSP00000362413,ENSP00000384273,ENSP00000402103,ENSP00000445175	ENO1,GAPDH,HK1,LDHA,PGK1,RELA,TFRC,TIMP1
hsa05130	Pathogenic Escherichia coli infection	6	53	0.0035	ENSP00000228825,ENSP00000294742,ENSP00000320295,ENSP00000356042,ENSP00000379287,ENSP00000388169	ARPC3,ARPC4,ARPC5,ENSG00000258947,EZR,YWHAZ
hsa05160	Hepatitis C	9	131	0.0043	ENSP00000228928,ENSP00000229795,ENSP00000233057,ENSP00000293362,ENSP00000315768,ENSP00000324804,ENSP00000342278,ENSP00000354394,ENSP00000384273	EIF2AK2,MAPK14,OAS2,OAS3,PPP2R1A,PSME3,RELA,STAT1,STAT2
hsa05418	Fluid shear stress and atherosclerosis	9	133	0.0045	ENSP00000219070,ENSP00000229795,ENSP00000261023,ENSP00000335153,ENSP00000345344,ENSP00000360609,ENSP00000363641,ENSP00000381607,ENSP00000384273	CTSL,GSTP1,HSP90AA1,HSP90AB1,ITGAV,MAPK14,MMP2,RELA,TXN
hsa04146	Peroxisome	7	81	0.0048	ENSP00000264167,ENSP00000333664,ENSP00000348429,ENSP00000350012,ENSP00000357051,ENSP00000359233,ENSP00000360569	ABCD3,ACAA1,ACSL3,ACSL5,AGPS,PEX19,SCP2
hsa00310	Lysine degradation	6	59	0.0052	ENSP00000196061,ENSP00000223127,ENSP00000265838,ENSP00000282903,ENSP00000346827,ENSP00000474560	ACAT1,ALDH9A1,HADH,PLOD1,PLOD2,PLOD3
hsa05145	Toxoplasmosis	8	109	0.0052	ENSP00000222399,ENSP00000229795,ENSP00000230538,ENSP00000264144,ENSP00000324532,ENSP00000354394,ENSP00000375778,ENSP00000384273	LAMA3,LAMA4,LAMB1,LAMB3,LAMC2,MAPK14,RELA,STAT1
hsa04810	Regulation of actin cytoskeleton	11	205	0.0063	ENSP00000228825,ENSP00000261023,ENSP00000261799,ENSP00000268182,ENSP00000293379,ENSP00000294742,ENSP00000296181,ENSP00000296585,ENSP00000356042,ENSP00000388169,ENSP00000432660	ARPC3,ARPC4,ARPC5,CFL1,EZR,IQGAP1,ITGA2,ITGA5,ITGAV,ITGB5,PDGFRB
hsa05131	Shigellosis	6	63	0.0065	ENSP00000228825,ENSP00000229795,ENSP00000293379,ENSP00000294742,ENSP00000384273,ENSP00000388169	ARPC3,ARPC4,ARPC5,ITGA5,MAPK14,RELA
hsa05230	Central carbon metabolism in cancer	6	65	0.0073	ENSP00000179259,ENSP00000261799,ENSP00000320171,ENSP00000402103,ENSP00000445175,ENSP00000463978	C12orf5,HK1,LDHA,PDGFRB,PKM,SLC16A3
hsa04218	Cellular senescence	9	156	0.0106	ENSP00000229795,ENSP00000265333,ENSP00000295006,ENSP00000303754,ENSP00000362144,ENSP00000363435,ENSP00000370473,ENSP00000378323,ENSP00000384273	CAPN2,IGFBP3,ITPR3,MAPK14,MCU,PPID,PPP3CA,RELA,VDAC1
hsa04933	AGE-RAGE signaling pathway in diabetic complications	7	98	0.0109	ENSP00000219070,ENSP00000225964,ENSP00000229795,ENSP00000297268,ENSP00000304408,ENSP00000354394,ENSP00000384273	COL1A1,COL1A2,COL3A1,MAPK14,MMP2,RELA,STAT1
hsa04979	Cholesterol metabolism	5	48	0.0109	ENSP00000243077,ENSP00000265333,ENSP00000399421,ENSP00000421922,ENSP00000442464	CD36,LRP1,LRPAP1,NCEH1,VDAC1
hsa00480	Glutathione metabolism	5	50	0.0125	ENSP00000229416,ENSP00000373477,ENSP00000374265,ENSP00000381607,ENSP00000423822	GCLC,GPX2,GPX3,GPX8,GSTP1
hsa00760	Nicotinate and nicotinamide metabolism	4	30	0.0134	ENSP00000222553,ENSP00000339479,ENSP00000371362,ENSP00000441434	NADK2,NAMPT,NNMT,NT5C2
hsa00640	Propanoate metabolism	4	32	0.0162	ENSP00000265838,ENSP00000359871,ENSP00000379386,ENSP00000445175	ACADM,ACAT1,LDHA,LDHB
hsa00380	Tryptophan metabolism	4	40	0.0317	ENSP00000265838,ENSP00000346827,ENSP00000472474,ENSP00000474560	ACAT1,ALDH9A1,HADH,IL4I1
hsa04142	Lysosome	7	123	0.0317	ENSP00000227266,ENSP00000236671,ENSP00000261416,ENSP00000268097,ENSP00000345344,ENSP00000345672,ENSP00000350911	CTSB,CTSC,CTSD,CTSE,CTSL,HEXA,HEXB
hsa04216	Ferroptosis	4	40	0.0317	ENSP00000229416,ENSP00000348429,ENSP00000350012,ENSP00000353224	ACSL3,ACSL5,GCLC,TFRC
hsa04611	Platelet activation	7	123	0.0317	ENSP00000225964,ENSP00000229795,ENSP00000296585,ENSP00000297268,ENSP00000304408,ENSP00000363435,ENSP00000389414	COL1A1,COL1A2,COL3A1,ITGA2,ITPR3,MAPK14,TBXAS1
hsa04141	Protein processing in endoplasmic reticulum	8	161	0.0348	ENSP00000233057,ENSP00000254322,ENSP00000295006,ENSP00000306881,ENSP00000318687,ENSP00000335153,ENSP00000360609,ENSP00000379042	CAPN2,DNAJB1,EIF2AK2,ERO1L,HSP90AA1,HSP90AB1,HSPH1,SEC23A
hsa00270	Cysteine and methionine metabolism	4	44	0.0399	ENSP00000229416,ENSP00000379386,ENSP00000445175,ENSP00000472474	GCLC,IL4I1,LDHA,LDHB
hsa04915	Estrogen signaling pathway	7	133	0.041	ENSP00000219070,ENSP00000236671,ENSP00000308452,ENSP00000335153,ENSP00000355124,ENSP00000360609,ENSP00000363435	CTSD,HSP90AA1,HSP90AB1,ITPR3,KRT17,KRT19,MMP2
hsa05162	Measles	7	133	0.041	ENSP00000228928,ENSP00000233057,ENSP00000315768,ENSP00000342278,ENSP00000354394,ENSP00000381601,ENSP00000384273	EIF2AK2,MX1,OAS2,OAS3,RELA,STAT1,STAT2
hsa01230	Biosynthesis of amino acids	5	72	0.0412	ENSP00000229239,ENSP00000234590,ENSP00000320171,ENSP00000361512,ENSP00000362413	ENO1,GAPDH,PGK1,PKM,PRPS1
hsa04659	Th17 cell differentiation	6	102	0.0412	ENSP00000229795,ENSP00000335153,ENSP00000354394,ENSP00000360609,ENSP00000378323,ENSP00000384273	HSP90AA1,HSP90AB1,MAPK14,PPP3CA,RELA,STAT1
hsa05100	Bacterial invasion of epithelial cells	5	72	0.0412	ENSP00000228825,ENSP00000264893,ENSP00000293379,ENSP00000294742,ENSP00000388169	ARPC3,ARPC4,ARPC5,ITGA5,SEPT11
hsa05412	Arrhythmogenic right ventricular cardiomyopathy (ARVC)	5	72	0.0412	ENSP00000261023,ENSP00000293379,ENSP00000296181,ENSP00000296585,ENSP00000357283	ITGA2,ITGA5,ITGAV,ITGB5,LMNA
hsa05133	Pertussis	5	74	0.0423	ENSP00000229795,ENSP00000247470,ENSP00000293379,ENSP00000384273,ENSP00000432660	CFL1,ITGA5,MAPK14,PYCARD,RELA
hsa00983	Drug metabolism - other enzymes	5	76	0.046	ENSP00000343838,ENSP00000359211,ENSP00000364212,ENSP00000379038,ENSP00000381607	CDA,DPYD,GSTP1,TYMP,UGT1A10
