# Supplementary material for: Integrated proteomics and phosphoproteomics reveal perturbed regulative pathways in pancreatic ductal adenocarcinoma
Source: Royal Society of Chemistry journal article supplement (doi:10.1039/d0mo00125b), 2020-12-23
Supplement: d0mo00125b1.zip [file Table S5. GO enrichment analysis result relevant to the dysregulated proteins.xlsx]

## Sheet: Down
Category	GO	Category	Description	Count	%	Log10(P)	Log10(q)
Downregulated in PDAC	GO:0016491	GO Molecular Functions	oxidoreductase activity	17	39.53	-15.39	-11.04
Downregulated in PDAC	GO:0051186	GO Biological Processes	cofactor metabolic process	13	30.23	-11.42	-7.67
Downregulated in PDAC	GO:0042398	GO Biological Processes	cellular modified amino acid biosynthetic process	5	11.63	-7.91	-4.82
Downregulated in PDAC	GO:0042180	GO Biological Processes	cellular ketone metabolic process	7	16.28	-6.88	-3.85
Downregulated in PDAC	GO:0010035	GO Biological Processes	response to inorganic substance	9	20.93	-6.78	-3.77
Downregulated in PDAC	GO:0006979	GO Biological Processes	response to oxidative stress	8	18.6	-6.35	-3.4
Downregulated in PDAC	GO:0001659	GO Biological Processes	temperature homeostasis	5	11.63	-5.16	-2.3
Downregulated in PDAC	GO:0016788	GO Molecular Functions	hydrolase activity, acting on ester bonds	6	13.95	-2.96	-0.33
Downregulated in PDAC	GO:0048471	GO Cellular Components	perinuclear region of cytoplasm	5	11.63	-2.3	0
Upregulated in PDAC	GO:0062023	GO Cellular Components	collagen-containing extracellular matrix	63	22.58	-54.18	-49.83
Upregulated in PDAC	GO:0050839	GO Molecular Functions	cell adhesion molecule binding	50	17.92	-33.65	-30.07
Upregulated in PDAC	GO:0005912	GO Cellular Components	adherens junction	45	16.13	-26.93	-23.43
Upregulated in PDAC	GO:0005788	GO Cellular Components	endoplasmic reticulum lumen	32	11.47	-22.39	-19.18
Upregulated in PDAC	GO:0005509	GO Molecular Functions	calcium ion binding	43	15.41	-20.65	-17.55
Upregulated in PDAC	GO:0045055	GO Biological Processes	regulated exocytosis	43	15.41	-18.78	-15.7
Upregulated in PDAC	GO:0005518	GO Molecular Functions	collagen binding	16	5.73	-17.03	-14
Upregulated in PDAC	GO:0001568	GO Biological Processes	blood vessel development	37	13.26	-14.16	-11.22
Upregulated in PDAC	GO:0030199	GO Biological Processes	collagen fibril organization	13	4.66	-14.14	-11.22
Upregulated in PDAC	GO:0005775	GO Cellular Components	vacuolar lumen	19	6.81	-13.9	-11
Upregulated in PDAC	GO:0032963	GO Biological Processes	collagen metabolic process	16	5.73	-13.54	-10.68
Upregulated in PDAC	GO:0009611	GO Biological Processes	response to wounding	34	12.19	-13.4	-10.6
Upregulated in PDAC	GO:0048471	GO Cellular Components	perinuclear region of cytoplasm	34	12.19	-13.05	-10.34
Upregulated in PDAC	GO:0005178	GO Molecular Functions	integrin binding	17	6.09	-13.01	-10.32
Upregulated in PDAC	GO:0032432	GO Cellular Components	actin filament bundle	13	4.66	-12.12	-9.46
Upregulated in PDAC	GO:0031589	GO Biological Processes	cell-substrate adhesion	23	8.24	-11.66	-9.03
Upregulated in PDAC	GO:0042470	GO Cellular Components	melanosome	14	5.02	-11.55	-8.94
Upregulated in PDAC	GO:0005539	GO Molecular Functions	glycosaminoglycan binding	19	6.81	-11.52	-8.92
Upregulated in PDAC	GO:0018126	GO Biological Processes	protein hydroxylation	9	3.23	-11.47	-8.87
Upregulated in PDAC	GO:0000904	GO Biological Processes	cell morphogenesis involved in differentiation	32	11.47	-11.21	-8.63
Table S5. Top 20 clusters with their representative enriched terms (one per cluster). "Count" is the number of genes in the user-provided lists with membership in the given ontology term. "%" is the percentage of all of the user-provided genes that are found in the given ontology term (only input genes with at least one ontology term annotation are included in the calculation). "Log10(P)" is the …
