# Supplementary material for: Integrated proteomics and phosphoproteomics reveal perturbed regulative pathways in pancreatic ductal adenocarcinoma
Source: Royal Society of Chemistry journal article supplement (doi:10.1039/d0mo00125b), 2020-12-23
Supplement: d0mo00125b1.zip [file Table S6. KEGG and Reactome pathways relevant to the dysregulated phosphoproteins.xlsx]

## Sheet: enrichment.RCTM
Reactome Pathway
#term ID	term description	observed gene count	background gene count	false discovery rate	matching proteins in your network (IDs)	matching proteins in your network (labels)
HSA-3108232	SUMO E3 ligases SUMOylate target proteins	10	154	0.0152	ENSP00000080059,ENSP00000264606,ENSP00000268058,ENSP00000314080,ENSP00000343023,ENSP00000371475,ENSP00000376077,ENSP00000384018,ENSP00000430432,ENSP00000458954	HDAC2,HDAC4,HDAC7,HIC1,NCOR2,NUP88,PML,SP100,SUMO1,TP53BP1
HSA-6802957	Oncogenic MAPK signaling	7	75	0.0152	ENSP00000211998,ENSP00000259371,ENSP00000316029,ENSP00000349960,ENSP00000357283,ENSP00000363371,ENSP00000379156	ACTB,CNKSR1,DAB2IP,LMNA,MPRIP,TLN1,VCL
HSA-109582	Hemostasis	19	601	0.0178	ENSP00000211998,ENSP00000251157,ENSP00000259708,ENSP00000293379,ENSP00000294618,ENSP00000300574,ENSP00000316029,ENSP00000336799,ENSP00000346032,ENSP00000349960,ENSP00000357076,ENSP00000358866,ENSP00000361883,ENSP00000363411,ENSP00000364209,ENSP00000378669,ENSP00000391669,ENSP00000414982,ENSP00000430432	ACTB,ALDOA,ANXA2,BCAR1,CAP1,CRK,DOCK6,DOCK7,FLNA,GNG10,HDAC2,ITGA5,KLC1,KLC4,MAGED2,TAGLN2,TLN1,TUBA1B,VCL
HSA-6802952	Signaling by BRAF and RAF fusions	6	59	0.0178	ENSP00000211998,ENSP00000316029,ENSP00000349960,ENSP00000357283,ENSP00000363371,ENSP00000379156	ACTB,CNKSR1,LMNA,MPRIP,TLN1,VCL
HSA-2122947	NOTCH1 Intracellular Domain Regulates Transcription	5	45	0.0308	ENSP00000080059,ENSP00000231487,ENSP00000264606,ENSP00000384018,ENSP00000430432	HDAC2,HDAC4,HDAC7,NCOR2,SKP1
HSA-5653656	Vesicle-mediated transport	19	649	0.0308	ENSP00000259708,ENSP00000263780,ENSP00000265062,ENSP00000318687,ENSP00000320117,ENSP00000325827,ENSP00000336799,ENSP00000349259,ENSP00000349351,ENSP00000349960,ENSP00000359000,ENSP00000360076,ENSP00000360798,ENSP00000370719,ENSP00000386443,ENSP00000386456,ENSP00000393776,ENSP00000414982,ENSP00000417354	AAK1,ACTB,BICD2,CHMP2B,EPS15,FCHO2,GBF1,GOLIM4,HSPH1,ITSN1,KLC1,KLC4,RAB7A,SEC16A,SGIP1,SPTBN1,TGOLN2,TRIP10,TUBA1B
HSA-8856828	Clathrin-mediated endocytosis	8	137	0.0308	ENSP00000320117,ENSP00000349960,ENSP00000360076,ENSP00000360798,ENSP00000370719,ENSP00000386443,ENSP00000386456,ENSP00000393776	AAK1,ACTB,EPS15,FCHO2,ITSN1,SGIP1,TGOLN2,TRIP10
HSA-199991	Membrane Trafficking	18	612	0.0324	ENSP00000259708,ENSP00000263780,ENSP00000265062,ENSP00000320117,ENSP00000325827,ENSP00000336799,ENSP00000349259,ENSP00000349351,ENSP00000349960,ENSP00000359000,ENSP00000360076,ENSP00000360798,ENSP00000370719,ENSP00000386443,ENSP00000386456,ENSP00000393776,ENSP00000414982,ENSP00000417354	AAK1,ACTB,BICD2,CHMP2B,EPS15,FCHO2,GBF1,GOLIM4,ITSN1,KLC1,KLC4,RAB7A,SEC16A,SGIP1,SPTBN1,TGOLN2,TRIP10,TUBA1B
HSA-5663202	Diseases of signal transduction	13	360	0.0324	ENSP00000080059,ENSP00000211998,ENSP00000231487,ENSP00000259371,ENSP00000264606,ENSP00000269571,ENSP00000316029,ENSP00000349960,ENSP00000357283,ENSP00000363371,ENSP00000379156,ENSP00000384018,ENSP00000430432	ACTB,CNKSR1,DAB2IP,ERBB2,HDAC2,HDAC4,HDAC7,LMNA,MPRIP,NCOR2,SKP1,TLN1,VCL
HSA-5683057	MAPK family signaling cascades	11	273	0.0324	ENSP00000211998,ENSP00000259371,ENSP00000264431,ENSP00000269571,ENSP00000295324,ENSP00000314067,ENSP00000316029,ENSP00000349259,ENSP00000349960,ENSP00000357055,ENSP00000363371	ACTB,CDC42EP3,CNKSR1,DAB2IP,ERBB2,PAK2,PEA15,RAPGEF2,SPTBN1,TLN1,VCL
HSA-6802949	Signaling by RAS mutants	5	52	0.0324	ENSP00000211998,ENSP00000259371,ENSP00000316029,ENSP00000349960,ENSP00000363371	ACTB,CNKSR1,DAB2IP,TLN1,VCL
HSA-75153	Apoptotic execution phase	5	51	0.0324	ENSP00000261590,ENSP00000303423,ENSP00000314067,ENSP00000323856,ENSP00000446007	DSG2,FNTA,PAK2,PLEC,VIM
HSA-111465	Apoptotic cleavage of cellular proteins	4	37	0.036	ENSP00000261590,ENSP00000303423,ENSP00000323856,ENSP00000446007	DSG2,FNTA,PLEC,VIM
HSA-114608	Platelet degranulation	7	125	0.036	ENSP00000211998,ENSP00000316029,ENSP00000357076,ENSP00000358866,ENSP00000361883,ENSP00000364209,ENSP00000378669	ALDOA,CAP1,FLNA,MAGED2,TAGLN2,TLN1,VCL
HSA-194315	Signaling by Rho GTPases	13	402	0.036	ENSP00000259708,ENSP00000314067,ENSP00000320117,ENSP00000336799,ENSP00000349960,ENSP00000354718,ENSP00000357177,ENSP00000358866,ENSP00000359552,ENSP00000370719,ENSP00000389168,ENSP00000414982,ENSP00000471457	ACTB,AKAP13,ARHGEF11,FLNA,ITSN1,KLC1,KLC4,MYO9B,PAK2,PKN2,PPP1R12A,TRIP10,TUBA1B
HSA-2028269	Signaling by Hippo	3	19	0.036	ENSP00000379364,ENSP00000429744,ENSP00000478927	MOB1A,STK3,YAP1
HSA-2644606	Constitutive Signaling by NOTCH1 PEST Domain Mutants	5	57	0.036	ENSP00000080059,ENSP00000231487,ENSP00000264606,ENSP00000384018,ENSP00000430432	HDAC2,HDAC4,HDAC7,NCOR2,SKP1
HSA-2894862	Constitutive Signaling by NOTCH1 HD+PEST Domain Mutants	5	57	0.036	ENSP00000080059,ENSP00000231487,ENSP00000264606,ENSP00000384018,ENSP00000430432	HDAC2,HDAC4,HDAC7,NCOR2,SKP1
HSA-3108214	SUMOylation of DNA damage response and repair proteins	5	69	0.036	ENSP00000080059,ENSP00000268058,ENSP00000343023,ENSP00000376077,ENSP00000458954	HDAC7,NUP88,PML,SP100,SUMO1
HSA-3232118	SUMOylation of transcription factors	3	16	0.036	ENSP00000314080,ENSP00000371475,ENSP00000376077	HIC1,SUMO1,TP53BP1
HSA-372708	p130Cas linkage to MAPK signaling for integrins	3	14	0.036	ENSP00000300574,ENSP00000316029,ENSP00000391669	BCAR1,CRK,TLN1
HSA-373755	Semaphorin interactions	5	64	0.036	ENSP00000258526,ENSP00000269571,ENSP00000314067,ENSP00000316029,ENSP00000357177	ARHGEF11,ERBB2,PAK2,PLXNC1,TLN1
HSA-445355	Smooth Muscle Contraction	4	32	0.036	ENSP00000211998,ENSP00000314067,ENSP00000316029,ENSP00000346032	ANXA2,PAK2,TLN1,VCL
HSA-5673001	RAF/MAP kinase cascade	9	229	0.036	ENSP00000211998,ENSP00000259371,ENSP00000264431,ENSP00000269571,ENSP00000316029,ENSP00000349259,ENSP00000349960,ENSP00000357055,ENSP00000363371	ACTB,CNKSR1,DAB2IP,ERBB2,PEA15,RAPGEF2,SPTBN1,TLN1,VCL
HSA-5674135	MAP2K and MAPK activation	4	39	0.036	ENSP00000211998,ENSP00000316029,ENSP00000349960,ENSP00000363371	ACTB,CNKSR1,TLN1,VCL
HSA-597592	Post-translational protein modification	29	1366	0.036	ENSP00000080059,ENSP00000231487,ENSP00000264606,ENSP00000265062,ENSP00000265333,ENSP00000268058,ENSP00000284320,ENSP00000314080,ENSP00000325827,ENSP00000328720,ENSP00000335677,ENSP00000336799,ENSP00000343023,ENSP00000349259,ENSP00000349960,ENSP00000355566,ENSP00000359000,ENSP00000369055,ENSP00000371475,ENSP00000373364,ENSP00000376077,ENSP00000379721,ENSP00000384018,ENSP00000385923,ENSP00000386043…	ACTB,B4GALT1,FOXK1,FOXK2,GBF1,GOLM1,HDAC2,HDAC4,HDAC7,HIC1,LMO7,LTBP1,NCOR2,NUCB1,NUP88,PML,RAB7A,SEC16A,SKP1,SP100,SPTBN1,SUMO1,TGOLN2,TOMM20,TOMM70A,TP53BP1,TUBA1B,USP8,VDAC1
HSA-6802946	Signaling by moderate kinase activity BRAF mutants	4	39	0.036	ENSP00000211998,ENSP00000316029,ENSP00000349960,ENSP00000363371	ACTB,CNKSR1,TLN1,VCL
HSA-6802948	Signaling by high-kinase activity BRAF mutants	4	35	0.036	ENSP00000211998,ENSP00000316029,ENSP00000349960,ENSP00000363371	ACTB,CNKSR1,TLN1,VCL
HSA-6802955	Paradoxical activation of RAF signaling by kinase inactive BRAF	4	39	0.036	ENSP00000211998,ENSP00000316029,ENSP00000349960,ENSP00000363371	ACTB,CNKSR1,TLN1,VCL
HSA-70171	Glycolysis	5	66	0.036	ENSP00000298198,ENSP00000359991,ENSP00000370517,ENSP00000378669,ENSP00000458954	ALDOA,NUP88,PFKP,PGAM1,PGM2L1
HSA-76002	Platelet activation, signaling and aggregation	10	256	0.036	ENSP00000211998,ENSP00000300574,ENSP00000316029,ENSP00000357076,ENSP00000358866,ENSP00000361883,ENSP00000363411,ENSP00000364209,ENSP00000378669,ENSP00000391669	ALDOA,BCAR1,CAP1,CRK,FLNA,GNG10,MAGED2,TAGLN2,TLN1,VCL
HSA-8856825	Cargo recognition for clathrin-mediated endocytosis	6	98	0.036	ENSP00000360076,ENSP00000360798,ENSP00000370719,ENSP00000386443,ENSP00000386456,ENSP00000393776	AAK1,EPS15,FCHO2,ITSN1,SGIP1,TGOLN2
HSA-5627123	RHO GTPases activate PAKs	3	20	0.0373	ENSP00000314067,ENSP00000358866,ENSP00000389168	FLNA,PAK2,PPP1R12A
HSA-913531	Interferon Signaling	8	189	0.0373	ENSP00000268058,ENSP00000343023,ENSP00000358866,ENSP00000376077,ENSP00000383274,ENSP00000433102,ENSP00000433664,ENSP00000458954	EIF4G2,EIF4G3,FLNA,NUP88,PML,SP100,SUMO1,TRIM3
HSA-983231	Factors involved in megakaryocyte development and platelet production	7	153	0.0427	ENSP00000251157,ENSP00000259708,ENSP00000294618,ENSP00000336799,ENSP00000349960,ENSP00000414982,ENSP00000430432	ACTB,DOCK6,DOCK7,HDAC2,KLC1,KLC4,TUBA1B
HSA-5205685	Pink/Parkin Mediated Mitophagy	3	22	0.0448	ENSP00000265333,ENSP00000284320,ENSP00000355566	TOMM20,TOMM70A,VDAC1
KEGG Pathway
#term ID	term description	observed gene count	background gene count	false discovery rate	matching proteins in your network (IDs)	matching proteins in your network (labels)
hsa04144	Endocytosis	10	242	0.0238	ENSP00000258098,ENSP00000263780,ENSP00000265062,ENSP00000268058,ENSP00000281419,ENSP00000324127,ENSP00000359000,ENSP00000360798,ENSP00000363482,ENSP00000379721	ASAP2,CHMP2B,EPS15,FAM21C,GBF1,PML,PSD3,RAB11FIP5,RAB7A,USP8
hsa04510	Focal adhesion	10	197	0.0238	ENSP00000211998,ENSP00000269571,ENSP00000293379,ENSP00000300574,ENSP00000314067,ENSP00000316029,ENSP00000349960,ENSP00000358866,ENSP00000389168,ENSP00000391669	ACTB,BCAR1,CRK,ERBB2,FLNA,ITGA5,PAK2,PPP1R12A,TLN1,VCL
hsa04530	Tight junction	8	167	0.0238	ENSP00000264431,ENSP00000269571,ENSP00000297508,ENSP00000336799,ENSP00000349960,ENSP00000361522,ENSP00000375960,ENSP00000377789	ACTB,ERBB2,MICALL2,MLLT4,RAPGEF2,SYNPO,TJAP1,TUBA1B
hsa04810	Regulation of actin cytoskeleton	9	205	0.0238	ENSP00000211998,ENSP00000293379,ENSP00000300574,ENSP00000312081,ENSP00000314067,ENSP00000315713,ENSP00000349960,ENSP00000389168,ENSP00000391669	ACTB,BCAR1,CRK,ITGA5,PAK2,PPP1R12A,SSH1,SSH3,VCL
hsa05100	Bacterial invasion of epithelial cells	6	72	0.0238	ENSP00000211998,ENSP00000293379,ENSP00000300574,ENSP00000349960,ENSP00000391669,ENSP00000479861	ACTB,BCAR1,CRK,ITGA5,SEPT2,VCL
hsa05132	Salmonella infection	6	84	0.0238	ENSP00000259708,ENSP00000265062,ENSP00000349960,ENSP00000358866,ENSP00000359552,ENSP00000414982	ACTB,FLNA,KLC1,KLC4,PKN2,RAB7A
hsa05412	Arrhythmogenic right ventricular cardiomyopathy (ARVC)	6	72	0.0238	ENSP00000070846,ENSP00000261590,ENSP00000293379,ENSP00000349960,ENSP00000357283,ENSP00000377508	ACTB,DSG2,ITGA5,JUP,LMNA,PKP2
hsa04520	Adherens junction	5	71	0.0349	ENSP00000211998,ENSP00000269571,ENSP00000349960,ENSP00000375960,ENSP00000433352	ACTB,ERBB2,LMO7,MLLT4,VCL
