# Supplementary material for: Integrated proteomics and phosphoproteomics reveal perturbed regulative pathways in pancreatic ductal adenocarcinoma
Source: Royal Society of Chemistry journal article supplement (doi:10.1039/d0mo00125b), 2020-12-23
Supplement: d0mo00125b1.zip [file Table S7. GO enrichment analysis result relevant to the dysregulated phosphoproteins.xlsx]

## Sheet: Sheet1
GO	Category	Description	Count	%	Log10(P)	Log10(q)
GO:0045296	GO Molecular Functions	cadherin binding	32	13.62	-23.68	-19.36
GO:0070161	GO Cellular Components	anchoring junction	39	16.6	-23.41	-19.36
GO:0003779	GO Molecular Functions	actin binding	34	14.47	-22.1	-18.23
GO:0051020	GO Molecular Functions	GTPase binding	29	12.34	-14.35	-11.04
GO:0031252	GO Cellular Components	cell leading edge	25	10.64	-13.6	-10.33
GO:0034329	GO Biological Processes	cell junction assembly	19	8.09	-12.09	-8.89
GO:0099513	GO Cellular Components	polymeric cytoskeletal fiber	29	12.34	-10.95	-7.83
GO:0044449	GO Cellular Components	contractile fiber part	16	6.81	-10.06	-7.04
GO:0019900	GO Molecular Functions	kinase binding	26	11.06	-8.88	-5.96
GO:0032970	GO Biological Processes	regulation of actin filament-based process	19	8.09	-8.72	-5.83
GO:0006735	GO Biological Processes	NADH regeneration	7	2.98	-8.68	-5.83
GO:0072659	GO Biological Processes	protein localization to plasma membrane	16	6.81	-8.58	-5.73
GO:0016607	GO Cellular Components	nuclear speck	18	7.66	-8	-5.28
GO:0034399	GO Cellular Components	nuclear periphery	11	4.68	-7.82	-5.11
GO:0060090	GO Molecular Functions	molecular adaptor activity	14	5.96	-7.72	-5.04
GO:0002064	GO Biological Processes	epithelial cell development	13	5.53	-7.16	-4.59
GO:0051098	GO Biological Processes	regulation of binding	16	6.81	-6.98	-4.43
GO:0000904	GO Biological Processes	cell morphogenesis involved in differentiation	23	9.79	-6.95	-4.4
GO:0002102	GO Cellular Components	podosome	6	2.55	-6.88	-4.35
GO:0005905	GO Cellular Components	clathrin-coated pit	8	3.4	-6.83	-4.32
Table S7. Top 20 clusters with their representative enriched terms (one per cluster). "Count" is the number of genes in the user-provided lists with membership in the given ontology term. "%" is the percentage of all of the user-provided genes that are found in the given ontology term (only input genes with at least one ontology term annotation are included in the calculation). "Log10(P)" is the …
